1 **Correlation and co-localization of QTL for stomatal density and canopy temperature under**  
2 **drought stress in Setaria**

3

4 Parthiban Thathapalli Prakash<sup>1,2,6</sup>, Darshi Banan<sup>2,3</sup>, Rachel E. Paul<sup>2,3</sup>, Maximilian J. Feldman<sup>4</sup>,  
5 Dan Xie<sup>2,3,7</sup>, Luke Freyfogle<sup>2,3</sup>, Ivan Baxter<sup>5</sup>, Andrew D.B. Leakey<sup>1,2,3</sup>

6

7 **Affiliations:**

8 <sup>1</sup>Department of Crop Sciences, University of Illinois at Urbana-Champaign, Urbana, IL 61801,  
9 USA

10 <sup>2</sup>Institute for Genomic Biology, University of Illinois at Urbana-Champaign, Urbana, IL 61801,  
11 USA

12 <sup>3</sup>Department of Plant Biology, University of Illinois at Urbana-Champaign, Urbana, IL 61801,  
13 USA

14 <sup>4</sup>USDA-ARS, 24106 N Bunn Rd, Prosser, WA 99350, USA

15 <sup>5</sup>Donald Danforth Plant Science Center, 975 North Warson Road, St Louis, MO  
16 63132, USA

17 **Current affiliation**

18 <sup>6</sup>International Rice Research Institute, Los Baños, Philippines

19 <sup>7</sup>Department of Medicinal Chemistry and Molecular Pharmacology, Purdue University, West  
20 Lafayette, IN 47907, USA

21

22 Parthiban Thathapalli Prakash – [tpparthiban@gmail.com](mailto:tpparthiban@gmail.com)

23 Darshi Banan – [banan.darshi@gmail.com](mailto:banan.darshi@gmail.com)

24 Rachel E. Paul – [repaul9@gmail.com](mailto:repaul9@gmail.com)

25 Maximilian J. Feldman – [Max.Feldman@usda.gov](mailto:Max.Feldman@usda.gov)

26 Ivan Baxter – [IBaxter@danforthcenter.org](mailto:IBaxter@danforthcenter.org)

27 Dan Xie – [xie243@purdue.edu](mailto:xie243@purdue.edu)

28 Luke Freyfogle – [lukefreyfogle14@gmail.com](mailto:lukefreyfogle14@gmail.com)

29 Andrew D.B. Leakey – [leakey@illinois.edu](mailto:leakey@illinois.edu)

30 Number of tables – 2

31 Number of figures – 12

32 Word count – 3667

33

34 **Running title:** Physiological genetics of stomatal density and canopy temperature in setaria

35

### 36 **Highlight**

37 This article reports a phenotypic and genetic relationship between two water use related traits  
38 operating at leaf level and canopy level in a C<sub>4</sub> model crop species.

39

### 40 **Abstract**

41 Mechanistic modeling indicates that stomatal conductance could be reduced to improve water  
42 use efficiency (WUE) in C<sub>4</sub> crops. Genetic variation in stomatal density and canopy temperature  
43 was evaluated in the model C<sub>4</sub> genus, *Setaria*. Recombinant inbred lines (RIL) derived from a  
44 *Setaria italica* x *Setaria viridis* cross were grown with ample or limiting water supply under field  
45 conditions in Illinois. An optical profilometer was used to rapidly assess stomatal patterning and  
46 canopy temperature was measured using infrared imaging. Stomatal density and canopy  
47 temperature were positively correlated but both were negatively correlated with total above-  
48 ground biomass. These trait relationships suggest a likely interaction between stomatal density  
49 and the other drivers of water use such as stomatal size and aperture. Multiple QTLs were  
50 identified for stomatal density and canopy temperature, including co-located QTLs on  
51 chromosomes 5 and 9. The direction of the additive effect of these QTLs on chromosome 5 and  
52 9 were in accordance with the positive phenotypic relationship between these two traits. This  
53 suggests a common genetic architecture between stomatal patterning in the greenhouse and  
54 canopy transpiration in the field, while highlighting the potential of setaria as a model to  
55 understand the physiology and genetics of WUE in C<sub>4</sub> species.

56

57 **Keywords:** *Setaria*, stomata, canopy temperature, drought, quantitative trait loci, optical  
58 tomography.

## 59 Introduction

60 Drought stress is the primary limiting factor to crop production worldwide (Boyer,  
61 1982). This is underpinned by the unavoidable loss of water vapor from leaves, via stomata, to  
62 the atmosphere in order for CO<sub>2</sub> to move in the reverse direction and be assimilated through  
63 photosynthesis. In the coming decades, crops are likely to experience increasingly erratic  
64 rainfall patterns, with more frequent and intense droughts, due to climate change (Stocker *et*  
65 *al.*, 2013). Irrigation of crops already accounts for ~70% of freshwater use, limiting the  
66 sustainability of any increase in irrigation to address drought limitations (Hamdy *et al.*, 2003).  
67 Consequently, there is great interest in understanding and improving crop water-use efficiency  
68 (WUE; Leakey *et al.*, 2019) as well as crop drought resistance (Cattivelli *et al.*, 2008).

69 Substantial advances have been made in understanding WUE and drought resistance at  
70 the genetic, molecular, biochemical and physiological levels in the model species, *Arabidopsis*  
71 *thaliana* (Zhang *et al.*, 2004; Valliyodan and Nguyen, 2006; Nakashima *et al.*, 2012).  
72 Unfortunately, efforts to translate this knowledge into improved performance of crop plants in  
73 the production environment have not resulted in success as frequently as hoped (e.g. Nelson *et*  
74 *al.*, 2007; Nemali *et al.*, 2015). Physiological, agronomic and breeding studies directly in crops  
75 have also resulted in improved drought avoidance and drought tolerance (e.g. Condon *et al.*,  
76 2004; Sinclair *et al.*, 2017), but there are challenges associated with trying to apply modern  
77 systems biology and bioengineering tools to crops that are relatively large in stature and have  
78 generation times of several months. Consequently, *Setaria viridis* (L.) has been proposed as a  
79 model C<sub>4</sub> grass that has characteristics that make it tractable for systems and synthetic biology  
80 while also being closely related to key C<sub>4</sub> crops, so that discoveries are more likely to translate  
81 to production crops (Brutnell *et al.*, 2010; Li and Brutnell, 2011). This study aimed to assess  
82 natural genetic variation in *Setaria* for traits two key traits related to WUE and drought  
83 response: stomatal density and canopy temperature (as a proxy for the rate of whole-plant  
84 water use).

85 *Setaria italica* and *Setaria viridis* are model C<sub>4</sub> grasses belonging to the panicoideae  
86 subfamily, which also includes maize, sorghum, sugarcane, miscanthus and switchgrass  
87 (Brutnell *et al.*, 2010; Li and Brutnell, 2011). Foxtail millet (*Setaria italica*) is also a food crop in

88 China and India (Devos *et al.*, 1998). The availability of sequence data for its relatively small  
89 diploid ( $2n = 18$ ) genome, short life cycle, small stature, high seed production, and amenability  
90 for transformation makes *Setaria* a good model species for genetic engineering (Brutnell *et al.*,  
91 2010; Bennetzen *et al.*, 2012). In addition, *Setaria* is adapted to arid conditions and is a  
92 potential source of genes conferring WUE and drought resistance.

93 Whole plant WUE is the ratio of plant biomass accumulated to the amount of water  
94 used over the growing season (Condon *et al.*, 2004; Morison *et al.*, 2007; Blum, 2009; Tardieu,  
95 2013). WUE at the leaf level is a complex trait controlled by factors including photosynthetic  
96 metabolism, stomatal characteristics, mesophyll conductance and hydraulics (Farquhar *et al.*,  
97 1989; Condon *et al.*, 2002; Hetherington and Woodward, 2003). At the whole-plant scale it is  
98 modified by canopy architecture and root structure and function (Martre *et al.*, 2001; White  
99 and Snow, 2012).

100 Stomata regulate the exchange of water and carbon dioxide ( $\text{CO}_2$ ) between the internal  
101 leaf airspace and the atmosphere (Hetherington and Woodward, 2003; Bertolino *et al.*, 2019).  
102 Stomatal conductance ( $g_s$ ), which is the inverse of the resistance to  $\text{CO}_2$  uptake and water loss,  
103 is controlled by a combination of stomatal density, patterning across the leaf surface, maximum  
104 pore size, and operating aperture (Faralli *et al.*, 2019; Nunes *et al.*, 2020). Of these traits,  
105 stomatal density is most simple to measure (Dow and Bergmann, 2014). Consequently, genetic  
106 variation in stomatal density has been explored in a range of species, including the  
107 identification of quantitative trait loci (QTL) in rice (Laza *et al.*, 2010), wheat (Schoppach *et al.*,  
108 2016; Shahinnia *et al.*, 2016), barley (Liu *et al.*, 2017), *Arabidopsis* (Dittberner *et al.*, 2018;  
109 Delgado *et al.*, 2019), brassica (Hall *et al.*, 2005), poplar (Dillen *et al.*, 2008) and oak (Gailing *et al.*,  
110 2008). However, there is a notable knowledge gap regarding genetic variation in stomatal  
111 density within  $\text{C}_4$  species. While many genes involved in the regulation of stomatal  
112 development are known in *Arabidopsis*, investigation of whether their orthologs retain the  
113 same function in grasses and other phylogenetic groups that include the major crops is still  
114 relatively nascent (e.g. Raissig *et al.*, 2017; Lu *et al.*, 2019; Mohammed *et al.*, 2019). This is in  
115 part because standard protocols for measuring stomatal density are still laborious and time  
116 consuming, which slows the application of quantitative, forward, and reverse genetics

117 approaches to identifying candidate genes and confirming their function. Therefore, improved  
118 methods for acquiring and analyzing images of stomatal guard cell complexes and other cell  
119 types in the epidermis are an area of active research (Haus *et al.*, 2015; Dittberner *et al.*, 2018;  
120 Fetter *et al.*, 2019; Li *et al.*, 2019). In addition, alternative approaches to rapidly screen stomatal  
121 conductance or rates of transpiration at the leaf and canopy scales (including temperature as a  
122 proxy) have also been developed and used to reveal genetic variation in traits related to  
123 drought stress and WUE (Liu *et al.*, 2011; Bennett *et al.*, 2012; Awika *et al.*, 2017; Prado *et al.*,  
124 2018; Deery *et al.*, 2019; Violet-Chabrand and Lawson, 2019). However, the expected links  
125 between genetic variation in stomatal density and measures of water use, which would be  
126 expected in theory, are rarely tested and when tested, the results are inconsistent (e.g. Fischer  
127 *et al.*, 1998; Ohsumi *et al.*, 2007; Kholová *et al.*, 2010; Schoppach *et al.*, 2016).

128 To address these questions, we used a field study of a biparental mapping population  
129 developed from an interspecific cross between *Setaria viridis* (A10) and *Setaria italica* (B100).

130 The study was designed with the aim of (i) applying rapid, image-based methods for  
131 phenotyping stomatal density and canopy water use; (ii) Identifying variation in stomatal  
132 patterning, canopy temperature and productivity; (iii) assessing trait relationships between  
133 stomatal density, canopy temperature and biomass production; and (iv) identifying quantitative  
134 trait loci for these traits in *Setaria*, grown in the field under wet and dry treatments.

135

## 136 **Materials and methods**

### 137 *Plant material*

138 This study used a population of 120 F<sub>7</sub> recombinant inbred lines (RIL), which were  
139 generated by an interspecific cross between domesticated *Setaria italica* accession B100 and a  
140 wild-type *Setaria viridis* accession A10 (Devos *et al.*, 1998; Wang *et al.*, 1998).

141

### 142 *Greenhouse experiment*

143 Variation in stomatal density among the RILs was assessed in a greenhouse study at the  
144 University of Illinois, Urbana Champaign in 2015. Plants were grown in pots (10 x 10 x 8.75 cm)  
145 filled with potting mixture (Metro-Mix 360 plus, Sun Gro Horticulture). Three seeds were sown

146 directly into the pot. After germination, plants were thinned to one plant per pot. Growth  
147 conditions were 30/24 °C during the day/night and plants received supplemental  
148 photosynthetically active radiation from high-pressure sodium and metal halide lamps during  
149 the day ( $350 \mu\text{mol m}^{-2} \text{s}^{-1}$  on a 16-h day / 8-h night cycle). Throughout the growing period, water  
150 was added to pot capacity along with fertilizer (EXCEL-CAL-MAG 15-5-5) 2-3 times a week.

151 The youngest fully expanded leaf was excised from the plant 17 - 22 days after sowing,  
152 covered in wet paper towel, sealed in airtight bags, and stored at 4°C. Within 48 hours, a  
153 sample was excised with a razor blade from midway along the leaf to provide a cross-section  
154 from one leaf margin to the midrib (approximately 20-30 mm length, 3- 20 mm wide). This  
155 sample was attached to a glass microscope slide using double-sided adhesive tape and the  
156 abaxial surface immediately imaged using an  $\mu\text{surf}$  explorer optical topometer (Nanofocus,  
157 Oberhausen, Germany (Haus *et al.*, 2015). Four fields of view in a transect from the midrib to  
158 the edge of a single leaf were imaged using a 20x magnification objective lens. The images were  
159 then exported into TIF files and the stomatal number was counted using the cell counter tool in  
160 ImageJ software (<http://rsbweb.nih.gov/ij/>). Stomatal density was calculated by normalizing the  
161 number of stomata with the area of the field of view ( $0.64 \text{ mm}^2$ ). Data from each of the four  
162 fields of view were treated as subsamples and averaged to estimate mean stomatal density for  
163 each replicate plant of a given RIL.

164

#### 165 *Field experiment*

166 The field experiment to assess variation in canopy temperature and total above-ground  
167 biomass was conducted at the SoyFACE field site, University of Illinois, Urbana Champaign in  
168 2015, in the manner described by Feldman *et al.* (2017). The average air temperature over the  
169 growing season was 21.5 °C with a relative humidity of 82 % (Figure 1). In brief, plants were  
170 germinated in plug trays in the greenhouse and then after 9 days after sowing, seedlings were  
171 hand transplanted (July 15, 2015) into plots at the field site. Twelve retractable awnings (Gray  
172 *et al.*, 2016) were placed over the plots to block all water from any rainfall event in both wet  
173 and dry treatments. Drip irrigation was supplied once a week in order to maintain greater soil  
174 moisture in the wet treatment.

175

176 Each genotype subplot in the experiment measured 25 by 20 cm and contained 30  
177 plants with a grid spacing of 5 cm between the plants. There was 25 cm space for the alleyway  
178 between two columns of plots and 10 cm spacing between the rows of plots. Each awning  
179 contained 66 subplots including six check plots of the B100 accession. The volumetric water  
180 content in the center of each awning was measured every 15 minutes throughout the growing  
181 season using soil moisture probes (CS650; Campbell Scientific) at 5 and 25 cm depths.

182

183 Canopy temperature of all field plots under both wet and dry treatments was measured  
184 30 and 32 days after sowing (DAS) once canopy closure had occurred in all plots. A telescopic  
185 boom lift was used to collect images from a height of 9.1 m above the ground using a handheld  
186 infra-red camera (FLIR T400, FLIR Systems, Boston, MA, USA). On each date, one infrared and  
187 one RGB image was acquired for each awning, which consisted of 66 plots (Figure 2). The time  
188 of the measurements was between 11 am and 3 pm. Infrared imaging was performed only  
189 during clear and sunny weather conditions. Data from the 36 pixels at the center of each  
190 genotype subplot was used to estimate the canopy temperature (FLIR Tools, FLIR Systems,  
191 Boston, MA, USA). This ensured that temperature data were only sampled from pixels  
192 completely covered by plant canopy and not containing data from soil in the nearby alleys  
193 between plots.

194 Three plants from the center of each plot were destructively harvested 30 days after  
195 panicle emergence to estimate the shoot biomass. The plants were cut at the base and the leaf,  
196 stem and the panicles were separated and dried at 65°C. The dried weights of leaf, stem and  
197 panicle were summed to obtain the total shoot biomass.

198

### 199 *Data analysis*

200 The greenhouse experiment was conducted with four replicates of each RIL arranged in a  
201 randomized complete block design with 120 genotypes as described in the equation below,  
202 where  $Y_{ij}$  is the individual observation of the trait of interest,  $\mu$  is the overall mean, Genotype  $i$   
203 is the effect of the  $i^{\text{th}}$  genotype, Block  $j$  is the effect of the  $j^{\text{th}}$  block and  $\epsilon_{ij}$  is the error term.

204

205

$$Y_{ij} = \mu + \text{Genotype}_i + \text{Block}_j + \varepsilon_{ij}$$

206

207

208

209

210

211

$$Y_{ijkl} = \mu + \text{Block}_i + \text{Treatment}_j + \varepsilon_{ij} + \text{Awning}_{k(ij)} + \text{Genotype}_l + \text{Genotype} * \text{Treatment}_{lj} + \varepsilon_{ijkl}$$

212

213

214

215

216

217

218

219

220

221

222

$$H^2_{broad\ sense} = \frac{\sigma^2_{(Genotype)}}{\sigma^2_{(Genotype)} + \frac{\sigma^2_{(Genotype \times Treatment)}}{n_{treatments}} + \frac{\sigma^2_{(residual)}}{n_{reps}}}$$

223

224

225

226

227

228

229

230

231

The field experiment was conducted as a randomized complete block design in a split plot arrangement with 3 blocks, 2 treatment conditions, 12 awnings nested within treatments and blocks and 120 genotypes as described below

where  $Y_{ijkl}$  is the individual observation of the trait of interest,  $\mu$  is the overall mean,  $\text{Block}_i$  is the effect of the  $i^{\text{th}}$  block,  $\text{Treatment}_j$  is the effect of the  $j^{\text{th}}$  treatment and  $\varepsilon_{ij}$  is the first error term,  $\text{Awning}_{k(ij)}$  is the  $k^{\text{th}}$  awning nested within  $\text{Block}_i$  and  $\text{Treatment}_j$ ,  $\text{Genotype}_l$  is the  $l^{\text{th}}$  genotype,  $\text{Genotype} * \text{Treatment}_{lj}$  is the interaction between  $\text{Genotype}_l$  and  $\text{Treatment}_j$  and  $\varepsilon_{ijkl}$  is the second error term.

The broad sense heritability on a line mean basis was computed using the variance components from the mixed model using the below formula.

The variance components from the mixed model were extracted using lme4 package in R (Bates *et al.*, 2015). Best linear unbiased predictors (BLUPs) were calculated for each trait of interest using the experimental designs discussed earlier where genotypes and blocks were considered as random effects and treatment and awning as fixed effects.

The quantitative trait loci (QTL) mapping was performed on the BLUP values for stomatal density and canopy temperature under different treatments and sampling dates using ~1400 Single Nucleotide Polymorphism (SNP) markers. Mapping was performed using a custom biparental linkage mapping program (Feldman *et al.*, 2017) based upon the functionality



232 encoded within the R/qtl (Broman *et al.*, 2003) and funqtl (Kwak *et al.*, 2014) packages in R. A  
233 two-step procedure was performed (Feldman *et al.*, 2017). First a single QTL model genome  
234 scan was performed using Haley-Knott regression to identify QTLs with LOD score higher than  
235 the significant threshold obtained through 1000 permutations at alpha 0.05. Second a stepwise  
236 forward/backward selection procedure was performed to identify an additive, multiple QTL  
237 model based upon maximization of penalized LOD score. The two-step procedure was  
238 conducted on all the traits and timepoints. QTLs that lie within 20 cM window are considered to  
239 be the same QTL.

240

## 241 **Results**

### 242 *Soil moisture profile*

243 Soil moisture content was equivalent in the wet and dry treatments at the beginning of  
244 the experiment (Figure 3). As time progressed, plants in the wet treatment continued to have  
245 adequate water supply (30 – 40 % vol/vol) throughout the growing period. By contrast, plants in  
246 the dry treatment experienced progressively drier soil conditions as the water they transpired  
247 was not replaced by rainfall or irrigation. The soil moisture was reduced in the dry treatment  
248 compared to the wet treatment at 5 cm and 25 cm depth by 20 DAS, resulting in a statistically  
249 significant interaction between treatment and time ( $p < 0.001$ ) as well as significant overall  
250 effects of drought treatment ( $p < 0.001$ ), depth ( $p < 0.001$ ) and time ( $p < 0.001$ ). Midday canopy  
251 temperature data was collected after this date, 30 and 32 DAS, when plants in the dry  
252 treatment were experiencing rapidly decreasing availability of soil moisture. This indicates that  
253 while plants in the dry treatment were subjected to limited water supply, they were still  
254 physiologically active i.e. drought stress was moderate.

255

### 256 *Genotypic variation in stomatal density and canopy temperature*

257 Among the 120 RILs, stomatal density on the abaxial surface of the youngest fully  
258 expanded leaf ranged between 58 to 115 stomata/mm<sup>2</sup> with a mean of 84 stomata/mm<sup>2</sup>  
259 (Figure 4 and Figure 5). The broad sense heritability of stomatal density was 0.58. Among the  
260 120 RILs, the mean canopy temperature at midday ranged from 28.8- 31.9 °C at 30 DAS and

261 28.6- 31.9 °C at 32 DAS in the wet treatment, and from 30.9- 39.2 °C at 30 DAS and 29.3- 38.1 °C  
262 at 32 DAS in the dry treatment. The mean midday canopy temperature across the RIL  
263 population was greater in the dry treatment than the wet treatment at both 30 DAS (32.9 °C  
264 versus 29.9 °C;  $p < 0.001$ ) and 32 DAS (32.0 °C versus 29.6 °C;  $p < 0.001$ ; Figure 6), with the  
265 treatment effect being slightly greater at 30 DAS (3.0 °C) than 32 DAS (2.4 °C). Midday canopy  
266 temperature was positively correlated between the two measurement dates for both wet ( $\rho =$   
267 0.78,  $p < 0.001$ ) and dry ( $\rho = 0.66$ ,  $p < 0.001$ ) conditions, which gives confidence in the  
268 phenotyping method (Figure 7). The broad sense heritability of canopy temperature was 0.54  
269 and 0.40 in 30 and 32 DAS, respectively.

270

#### 271 *Phenotypic relationships among canopy temperature, stomatal density and total biomass*

272 Midday canopy temperature was negatively correlated with total above-ground biomass  
273 under both wet and dry treatments at both 30 DAS (wet:  $r = -0.38$ ,  $p < 0.001$ ; dry:  $r = -0.32$ ,  $p <$   
274  $0.001$ ) and 32 DAS (wet:  $r = -0.49$ ,  $p < 0.001$ ; dry:  $r = -0.46$ ,  $p < 0.001$ ; Figure 8). The average  
275 increase in total above-ground biomass production associated with a decrease in midday  
276 canopy temperature of 1 °C was greater in the wet treatment than the dry treatment on both  
277 measurement dates (Table 1). The amount of variation in total above-ground biomass  
278 production explained by variation in midday canopy temperature was slightly greater in the wet  
279 treatment than the dry treatment on both sampling dates (Table 1). The parental line A10  
280 recorded was one of the genotypes with lowest biomass and highest canopy temperature  
281 under both treatments and days of measurement, while the parental line B100 had trait values  
282 that were close to the mean of the population.

283 Stomatal density was positively correlated with midday canopy temperature under both  
284 wet and dry treatments at both 30 DAS (wet:  $r = 0.40$ ,  $p < 0.001$ ; dry:  $r = 0.38$ ,  $p < 0.001$ ) and 32  
285 DAS (wet:  $r = 0.37$ ,  $p < 0.001$ ; dry:  $r = 0.39$ ,  $p < 0.001$ ; Figure 9). And, correspondingly,  
286 stomatal density was negatively correlated with total above-ground biomass under both dry ( $\rho =$   
287  $-0.33$ ,  $p < 0.001$ ) and wet ( $r = -0.23$ ,  $p = 0.012$ ) conditions (Figure 10). The correlation  
288 between stomatal density and total biomass was stronger under the dry treatment than the  
289 wet treatment.

290

### 291 *QTL mapping results*

292 QTL analysis identified three significant loci for stomatal density and eight significant loci  
293 for canopy temperature (Table 2, Figure 11). The proportion of phenotypic variation associated  
294 with these QTLs ranged between 8 to 23 percent for both the traits. QTLs across different traits  
295 were considered to be overlapping if they were within a 20cM window and others that fall  
296 outside this window were considered to be unique QTLs (Feldman *et al.*, 2017). Two QTLs co-  
297 localized for both stomatal density and canopy temperature one on chromosome 5 and one on  
298 chromosome 9. All four alleles had negative additive effects, indicating that the B100 allele was  
299 reducing both stomatal density and canopy temperature.

300

### 301 **Discussion**

302 This study successfully characterized phenotypic and genetic variation in stomatal  
303 density and rates of canopy water use in *Setaria*, which can be used as a foundation for future  
304 studies to apply systems biology approaches to advance understanding of WUE and drought  
305 resistance in  $C_4$  species. Significant trait correlations were detected among stomatal density,  
306 canopy temperature and total above-ground biomass both in the wet and dry treatments.

307 The stomatal densities of RILs in this population ( $58 - 115 \text{ mm}^{-2}$ ) were slightly greater  
308 than previously reported for faba bean ( $30 - 75 \text{ mm}^{-2}$  Khazaei *et al.*, 2014) and wheat ( $36 - 92$   
309  $\text{mm}^{-2}$  Schoppach *et al.*, 2016;  $43 - 92 \text{ mm}^{-2}$  Shahinnia *et al.*, 2016), but generally lower than  
310 *Arabidopsis* ( $90 - 210 \text{ mm}^{-2}$  Dittberner *et al.*, 2018) and rice ( $273 - 697 \text{ mm}^{-2}$  Laza *et al.*, 2010;  
311  $200 - 400 \text{ mm}^{-2}$  Kulya *et al.*, 2018). While the magnitude of variation in stomatal density among  
312 the RIL population was sufficient to allow for QTL mapping and analysis of trait correlations, the  
313 parents of the population were not selected on the basis of this trait. Thus, the resulting  
314 magnitude of variation across the population was relatively modest. It would be valuable to  
315 investigate how much more variation for stomatal density may be found among genotypes  
316 within either *S. italica* or *S. viridis*, as well as the genus as a whole. The present study provided a  
317 proof of concept for the use of optical tomography to image the leaf epidermis. As proposed by  
318 Haus *et al.* (2015), optical tomography does not require sample preparation steps and can also

319 be used on frozen leaf samples. This was significantly less laborious and more convenient than  
320 standard methods of taking leaf imprints of fresh leaves with dental gum and nail varnish  
321 (Rowland-Bamford *et al.*, 1990).

322 The magnitude of variation in canopy temperature across the *Setaria* RIL population was  
323 similar to that observed for sorghum (Awika *et al.*, 2017) and wheat (Mason *et al.*, 2013) RIL  
324 populations. Variation in canopy temperature among the RIL population were similar on 30 DAS  
325 (wet 3.1 °C, dry 8.3 °C) and 32 DAS (wet 3.3 °C, dry 8.8 °C) and canopy temperature was  
326 correlated across the two dates sampled for both the wet ( $\rho = 0.78$ ) and dry treatments ( $\rho =$   
327 0.66). This might be considered surprising given the highly dynamic nature of canopy  
328 temperature in response to wind gusts, diurnal variation in solar radiation, and daily or  
329 seasonal variation in climate. But, the reproducibility of the data across dates is consistent with  
330 the comprehensive analysis by Deery *et al.* (2019), which analyzed 98 independent timepoints  
331 of canopy temperature data collected for a wheat population over 14 dates in two years. They  
332 concluded that canopy temperature could be reliably screened from one or two sampling  
333 points if data was collected under clear sky conditions in the afternoon, as was done in the  
334 current study. The present study also highlighted that *Setaria* as a highly tractable model for  
335 field trials because its small stature allows non-destructive, remote-sensing approaches to  
336 phenotyping, such as thermal imaging, to be performed on hundreds of replicated plots using  
337 hand-held cameras and a boom lift. This is significantly simpler in terms of data acquisition and  
338 data analysis than using drones or vehicles to gather data across field trials of crops with larger  
339 stature that require field trials covering larger areas (Deery *et al.*, 2016; Sagan *et al.*, 2019).

340 Canopy temperature was negatively correlated with the total above-ground biomass of  
341 the *Setaria* RILs under both wet and dry conditions. This is consistent with RILs that had higher  
342 temperatures due to less evaporative cooling being able to assimilate less CO<sub>2</sub>, and therefore  
343 producing less biomass, which was expected based on theory and previous studies (Fischer *et*  
344 *al.*, 1998; Jones, 2004). In addition, canopy temperature was significantly greater in the dry  
345 treatment compared to the wet treatment, which was consistent with stomatal closure  
346 reducing water use and evaporative cooling when there is limited water availability (Turner *et*  
347 *al.*, 2001). The relationship between canopy temperature and biomass was stronger in the wet

348 treatment than the dry treatment on both measurement dates. This was reflected in canopy  
349 temperature explaining a greater proportion of variation in biomass (i.e. greater correlation  
350 coefficient) and a greater loss of biomass production per unit increase in canopy temperature  
351 under wet than dry conditions. This pattern of response is also consistent with prior  
352 observations (Bennett *et al.*, 2012; Mason *et al.*, 2013), but does not appear to have been the  
353 subject of much discussion. While it may seem initially counterintuitive that the relationship  
354 between the rate of water use and productivity would be weaker when water is limiting, it is  
355 consistent with genotypes that have inherently high rates of transpiration (i.e. cooler canopies)  
356 having greater reductions in productivity in response to drought stress than genotypes with  
357 inherently low rates of transpiration (i.e. warmer canopies). We suggest that this differential  
358 response may be conserved. And, it adds weight to the argument that genetic variation in WUE  
359 is best screened under well-watered conditions (Leahey *et al.*, 2019).

360         The positive correlation of stomatal density with the canopy temperature under drought  
361 stress suggests that the relationship between these two traits is complicated, since – if all else is  
362 equal – greater stomatal density would be expected to increase transpiration and lead to  
363 canopy cooling. Consistent with that theory, previous studies have reported that stomatal  
364 density is positively correlated with WUE (Xu and Zhou, 2008). However stomatal conductance  
365 is influenced by multiple factors, including stomatal density, maximum size and operating  
366 aperture (Dow and Bergmann, 2014; Faralli *et al.*, 2019). This implies that greater stomatal  
367 density within this population of *Setaria* RILs was associated with a developmental or functional  
368 shift that led to smaller stomatal apertures and lower rates of transpiration. As a result, within  
369 this population, lower stomatal density was also associated with greater biomass production.  
370 But, it should be noted that this relationship may be a function of the forced recombination  
371 across many parental alleles that is found in a RIL population. Breaking up gene linkage that can  
372 result from selection has been proposed to be a powerful approach to understand the  
373 biophysical basis for phenotypic relationships (Des Marais *et al.*, 2013). The observed positive  
374 correlation may reflect the developmental trade-off where stomatal size and stomatal density  
375 are widely found to be negatively correlated due to a limited amount of space on the epidermis  
376 (Shahinnia *et al.*, 2016; Faralli *et al.*, 2019), but this needs to be confirmed experimentally. By

377 contrast, stomatal density was either not correlated or weakly, positively correlated with yield  
378 in wheat grown under both well-watered and drought treatments (Khazaie *et al.*, 2011;  
379 Schoppach *et al.*, 2016; Shahinnia *et al.*, 2016; Faralli *et al.*, 2019). So, the balance of trade-offs  
380 between stomatal density and aperture may be different among different biparental mapping  
381 populations, if not more generally in *Setaria* versus wheat. It would be valuable to compare if  
382 the same phenotypic relationship is observed across other biparental populations within these  
383 species as well as across natural accessions of these crops.

384 This study identified three unique QTL each for stomatal density and canopy  
385 temperature. All three of the canopy temperature QTL were robust in terms of being observed  
386 in both the wet and dry treatments. In addition, the canopy temperature QTLs on  
387 chromosomes 5 and 9 co-localized with QTLs for stomatal density (Figure 11). Genetic fine  
388 mapping would be required to discount the possibility that there are two loci in linkage at those  
389 locations. But, the observed pattern could be the result of pleiotropy, where a single locus  
390 regulates both traits. And, this would be consistent with the consistent direction of the allelic  
391 effects as well as positive correlation between the two traits, as well as the theoretical  
392 expectation that stomatal patterning on the epidermis influences transpiration rates. In that  
393 case, the ability to detect the same QTL in a greenhouse screen of stomatal density as for  
394 canopy temperature in the field suggests that rapid controlled environment screening might be  
395 a tractable way to accelerate progress in understanding and manipulating epidermal patterning  
396 and WUE in *Setaria*. The small stature of *Setaria* makes it particularly amenable for that  
397 approach. More broadly, the proportion of phenotypic variation explained by the stomatal  
398 density QTLs in *Setaria* were also similar to those of faba bean (Khazaie *et al.*, 2014), rice (Laza  
399 *et al.*, 2010), and wheat (Shahinnia *et al.*, 2016; Wang *et al.*, 2016).

400 Previous studies have identified many QTLs for different morphological and  
401 physiological traits using the same RIL population in *Setaria* in both controlled environment and  
402 field experiments (Mauro-Herrera and Doust, 2016; Feldman *et al.*, 2017; Banan *et al.*, 2018;  
403 Feldman *et al.*, 2018; Ellsworth *et al.*, 2020). These include measurements of traits with direct  
404 relevance to this study such as WUE of biomass production (i.e. biomass production relative to  
405 water use, as assessed by image analysis and metered irrigation on a high-throughput

406 phenotyping platform linked to a controlled environment chamber). Meta-analysis of all the  
407 studies (Figure 12) reveals that QTL for stomatal density and canopy temperature overlap with  
408 QTLs for WUE,  $\delta^{13}\text{C}$  (Ellsworth *et al.*, 2020), plant height, panicle emergence, and various  
409 measures of above-ground productivity (Feldman *et al.*, 2017; Banan *et al.*, 2018) on  
410 chromosomes 5, 7 and 9. It is noteworthy that the percentage of the phenotypic variance  
411 explained by these QTLs for stomatal density and canopy temperature was typically equal to, or  
412 greater than, for the other traits assessed to date. One explanation for this would be that these  
413 loci directly regulate traits related to stomatal function and then indirectly influence the other  
414 traits via effects on crop water use. There is no reason to think the experimental design used  
415 here result in any greater statistical power to detect genotype to phenotype associations than  
416 the other studies. However, additional experimentation where all traits are measured  
417 simultaneously is needed to test this notion definitively.

418 In conclusion, this study identified genetic loci in *Setaria* that are associated with  
419 variation in stomatal density as well as many other traits important to WUE, productivity and  
420 drought resistance. This suggests that *Setaria* is an experimentally tractable model system that  
421 would be highly suitable for more in-depth investigation of the mechanisms underpinning  
422 stomatal development and their influence on WUE in  $\text{C}_4$  species. An additional benefit to  
423 identifying QTLs and genes in *Setaria* is that it is also an agronomic crop, so the findings could  
424 have direct relevance to crop improvement programs as well as potentially translating into  
425 benefits for close relatives including maize, sorghum and sugarcane.

426

## 427 **Supplementary data section**

428 Fig. S1. Field experiment layout for canopy temperature and biomass measurements

429

## 430 **Acknowledgements**

431 Funded by the U.S. Department of Energy under Prime Agreement Nos. DE-SC0008769 and DE-  
432 SC0018277. We thank Dr. Timothy Wertin for helping with the stomatal density sample  
433 collection and other undergrads and summer interns for their help with field management. We  
434 also thank many project partners from the Danforth Plant Science Center, Carnegie Institute,

435 Washington State University, and University of Minnesota that helped with transplanting  
436 seedlings.

437

#### 438 **Author contributions**

439 A.D.B.L. and I.B. conceived the original research plans. A.D.B.L., P.T.P., D.B., and R.E.P.  
440 supervised the experiments. P.T.P., collected the thermal images and processed the images.  
441 D.X. collected the stomatal images. P.T.P., D.B., and R.E.P., and L.F. managed the experiment  
442 and collected biomass data. P.T.P., M.F., I.B. and A.D.B.L. analyzed and interpreted the data.  
443 P.T.P. and A.D.B.L. wrote the article; M.F., I.B., D.B., R.E.P. and L.F. reviewed and commented on  
444 the article.

445

446

#### 447 **References**

448 **Awika H, Hays D, Mullet J, Rooney W, Weers B.** 2017. QTL mapping and loci dissection for leaf  
449 epicuticular wax load and canopy temperature depression and their association with QTL for  
450 staygreen in Sorghum bicolor under stress. *Euphytica* **213**, 207.

451 **Banan D, Paul RE, Feldman MJ, Holmes MW, Schlake H, Baxter I, Jiang H, Leakey ADB.** 2018.  
452 High-fidelity detection of crop biomass quantitative trait loci from low-cost imaging in the field.  
453 *Plant Direct* **2**, e00041.

454 **Bates D, Maechler M, Bolker B.** 2015. Walker., S. Fitting linear mixed-effects models using  
455 lme4. *Journal of Statistical Software* **67**, 1-48.

456 **Bennett D, Reynolds M, Mullan D, Izanloo A, Kuchel H, Langridge P, Schnurbusch T.** 2012.  
457 Detection of two major grain yield QTL in bread wheat (*Triticum aestivum* L.) under heat,  
458 drought and high yield potential environments. *Theoretical and Applied Genetics* **125**, 1473-  
459 1485.

460 **Bennetzen JL, Schmutz J, Wang H, et al.** 2012. Reference genome sequence of the model plant  
461 *Setaria*. *Nature Biotechnology* **30**, 555-561.

462 **Bertolino LT, Caine RS, Gray JE.** 2019. Impact of Stomatal Density and Morphology on Water-  
463 Use Efficiency in a Changing World. *Frontiers in Plant Science* **10**, 225.

464 **Blum A.** 2009. Effective use of water (EUW) and not water-use efficiency (WUE) is the target of  
465 crop yield improvement under drought stress. *Field Crops Research* **112**, 119-123.

466 **Boyer JS.** 1982. Plant productivity and environment. *Science* **218**, 443-448.



- 467 **Broman KW, Wu H, Sen S, Churchill GA.** 2003. R/qtl: QTL mapping in experimental crosses.  
468 *Bioinformatics* **19**, 889-890.
- 469 **Brutnell TP, Wang L, Swartwood K, Goldschmidt A, Jackson D, Zhu XG, Kellogg E, Van Eck J.**  
470 2010. *Setaria viridis*: a model for C4 photosynthesis. *Plant Cell* **22**, 2537-2544.
- 471 **Cattivelli L, Rizza F, Badeck F-W, Mazzucotelli E, Mastrangelo AM, Francia E, Marè C, Tondelli**  
472 **A, Stanca AM.** 2008. Drought tolerance improvement in crop plants: an integrated view from  
473 breeding to genomics. *Field Crops Research* **105**, 1-14.
- 474 **Condon AG, Richards RA, Rebetzke GJ, Farquhar GD.** 2002. Improving Intrinsic Water-Use  
475 Efficiency and Crop Yield. *Crop Science* **42**, 122-131.
- 476 **Condon AG, Richards RA, Rebetzke GJ, Farquhar GD.** 2004. Breeding for high water-use  
477 efficiency. *Journal of Experimental Botany* **55**, 2447-2460.
- 478 **Deery DM, Rebetzke G, Jimenez-Berni JA, Bovill B, James RA, Condon AG, Furbank R,**  
479 **Chapman S, Fischer R.** 2019. Evaluation of the phenotypic repeatability of canopy temperature  
480 in wheat using continuous-terrestrial and airborne measurements. *Frontiers in Plant Science* **10**,  
481 875.
- 482 **Deery DM, Rebetzke GJ, Jimenez-Berni JA, James RA, Condon AG, Bovill WD, Hutchinson P,**  
483 **Scarrow J, Davy R, Furbank RT.** 2016. Methodology for high-throughput field phenotyping of  
484 canopy temperature using airborne thermography. *Frontiers in Plant Science* **7**, 1808.
- 485 **Delgado D, Sánchez-Bermejo E, De Marcos A, Martín-Jimenez C, Fenoll C, Alonso-Blanco C,**  
486 **Mena M.** 2019. A genetic dissection of natural variation for stomatal abundance traits in  
487 *Arabidopsis*. *Frontiers in Plant Science* **10**, 1392.
- 488 **Des Marais DL, Hernandez KM, Juenger TE.** 2013. Genotype-by-environment interaction and  
489 plasticity: exploring genomic responses of plants to the abiotic environment. *Annual Review of*  
490 *Ecology, Evolution, and Systematics* **44**, 5-29.
- 491 **Devos KM, Wang Z, Beales J, Sasaki T, Gale M.** 1998. Comparative genetic maps of foxtail millet  
492 (*Setaria italica*) and rice (*Oryza sativa*). *Theoretical and Applied Genetics* **96**, 63-68.
- 493 **Dillen SY, Marron N, Koch B, Ceulemans R.** 2008. Genetic variation of stomatal traits and  
494 carbon isotope discrimination in two hybrid poplar families (*Populus deltoides* 'S9-2' × *P. nigra*  
495 'Ghoy' and *P. deltoides* 'S9-2' × *P. trichocarpa* 'V24'). *Annals of Botany* **102**, 399-407.
- 496 **Dittberner H, Korte A, Mettler-Altmann T, Weber AP, Monroe G, de Meaux J.** 2018. Natural  
497 variation in stomata size contributes to the local adaptation of water-use efficiency in  
498 *Arabidopsis thaliana*. *Molecular Ecology* **27**, 4052-4065.
- 499 **Dow GJ, Bergmann DC.** 2014. Patterning and processes: how stomatal development defines  
500 physiological potential. *Current Opinion in Plant Biology* **21**, 67-74.

- 501 **Ellsworth PZ, Feldman MJ, Baxter I, Cousins AB.** 2020. A genetic link between leaf carbon  
502 isotope composition and whole-plant water use efficiency in the C4 grass *Setaria*. *The Plant*  
503 *Journal* **102**, 1234–1248.
- 504 **Faralli M, Matthews J, Lawson T.** 2019. Exploiting natural variation and genetic manipulation of  
505 stomatal conductance for crop improvement. *Current Opinion in Plant Biology* **49**, 1-7.
- 506 **Farquhar G, Hubick K, Condon A, Richards R.** 1989. Carbon isotope fractionation and plant  
507 water-use efficiency. *Stable isotopes in ecological research*: Springer, 21-40.
- 508 **Feldman MJ, Ellsworth PZ, Fahlgren N, Gehan MA, Cousins AB, Baxter I.** 2018. Components of  
509 water use efficiency have unique genetic signatures in the model C4 grass *Setaria*. *Plant*  
510 *Physiology* **178**, 699-715.
- 511 **Feldman MJ, Paul RE, Banan D, et al.** 2017. Time dependent genetic analysis links field and  
512 controlled environment phenotypes in the model C4 grass *Setaria*. *PLoS Genetics* **13**, e1006841.
- 513 **Fetter KC, Eberhardt S, Barclay RS, Wing S, Keller SR.** 2019. StomataCounter: a neural network  
514 for automatic stomata identification and counting. *New Phytologist* **223**, 1671-1681.
- 515 **Fischer R, Rees D, Sayre K, Lu Z-M, Condon A, Saavedra AL.** 1998. Wheat yield progress  
516 associated with higher stomatal conductance and photosynthetic rate, and cooler canopies.  
517 *Crop science* **38**, 1467-1475.
- 518 **Gailing O, LANGENFELD-HEYSER R, Polle A, Finkeldey R.** 2008. Quantitative trait loci affecting  
519 stomatal density and growth in a *Quercus robur* progeny: implications for the adaptation to  
520 changing environments. *Global Change Biology* **14**, 1934-1946.
- 521 **Gray SB, Dermody O, Klein SP, et al.** 2016. Intensifying drought eliminates the expected  
522 benefits of elevated carbon dioxide for soybean. *Nature Plants* **2**, 16132.
- 523 **Hall N, Griffiths H, Corlett J, Jones H, Lynn J, King G.** 2005. Relationships between water-use  
524 traits and photosynthesis in *Brassica oleracea* resolved by quantitative genetic analysis. *Plant*  
525 *Breeding* **124**, 557-564.
- 526 **Hamdy A, Ragab R, Scarascia-Mugnozza E.** 2003. Coping with water scarcity: water saving and  
527 increasing water productivity. *Irrigation and Drainage* **52**, 3-20.
- 528 **Haus MJ, Kelsch RD, Jacobs TW.** 2015. Application of Optical Topometry to Analysis of the Plant  
529 Epidermis. *Plant Physiology* **169**, 946-959.
- 530 **Hetherington AM, Woodward FI.** 2003. The role of stomata in sensing and driving  
531 environmental change. *Nature* **424**, 901-908.
- 532 **Jones HG.** 2004. Application of thermal imaging and infrared sensing in plant physiology and  
533 ecophysiology. *Advances in Botanical Research*, Vol. 41: Elsevier, 107-163.

- 534 **Khazaie H, O'Sullivan DM, Sillanpää MJ, Stoddard FL.** 2014. Use of synteny to identify  
535 candidate genes underlying QTL controlling stomatal traits in faba bean (*Vicia faba* L.).  
536 *Theoretical and Applied Genetics* **127**, 2371-2385.
- 537 **Khazaie H, Mohammady S, Monneveux P, Stoddard F.** 2011. The determination of direct and  
538 indirect effects of carbon isotope discrimination ( $\Delta$ ), stomatal characteristics and water use  
539 efficiency on grain yield in wheat using sequential path analysis. *Australian Journal of Crop*  
540 *Science* **5**, 466.
- 541 **Kholová J, Hash CT, Kakkera A, Kočová M, Vadez V.** 2010. Constitutive water-conserving  
542 mechanisms are correlated with the terminal drought tolerance of pearl millet [*Pennisetum*  
543 *glaucum* (L.) R. Br.]. *Journal of Experimental Botany* **61**, 369-377.
- 544 **Kulya C, Siangliwb JL, Toojindab T, Lontoma W, Pattanagula W, Sriyota N, Sanitchon J,**  
545 **Theerakulpisuta P.** 2018. Variation in leaf anatomical characteristics in chromosomal segment  
546 substitution lines of KDML105 carrying drought tolerant QTL segments. *ScienceAsia* **44**, 197-  
547 211.
- 548 **Kwak I-Y, Moore CR, Spalding EP, Broman KW.** 2014. A simple regression-based method to  
549 map quantitative trait loci underlying function-valued phenotypes. *Genetics* **197**, 1409-1416.
- 550 **Laza MRC, Kondo M, Ideta O, Barlaan E, Imbe T.** 2010. Quantitative trait loci for stomatal  
551 density and size in lowland rice. *Euphytica* **172**, 149-158.
- 552 **Leakey AD, Ferguson JN, Pignon CP, Wu A, Jin Z, Hammer GL, Lobell DB.** 2019. Water use  
553 efficiency as a constraint and target for improving the resilience and productivity of C3 and C4  
554 crops. *Annual Review of Plant Biology* **70**, 781-808.
- 555 **Li K, Huang J, Song W, Wang J, Lv S, Wang X.** 2019. Automatic segmentation and measurement  
556 methods of living stomata of plants based on the CV model. *Plant methods* **15**, 67.
- 557 **Li P, Brutnell TP.** 2011. *Setaria viridis* and *Setaria italica*, model genetic systems for the Panicoid  
558 grasses. *Journal of Experimental Botany* **62**, 3031-3037.
- 559 **Liu X, Fan Y, Mak M, et al.** 2017. QTLs for stomatal and photosynthetic traits related to salinity  
560 tolerance in barley. *BMC Genomics* **18**, 9.
- 561 **Liu Y, Subhash C, Yan J, Song C, Zhao J, Li J.** 2011. Maize leaf temperature responses to  
562 drought: Thermal imaging and quantitative trait loci (QTL) mapping. *Environmental and*  
563 *Experimental Botany* **71**, 158-165.
- 564 **Lu J, He J, Zhou X, Zhong J, Li J, Liang Y-K.** 2019. Homologous genes of epidermal patterning  
565 factor regulate stomatal development in rice. *Journal of Plant Physiology* **234**, 18-27.
- 566 **Martre P, Cochard H, Durand JL.** 2001. Hydraulic architecture and water flow in growing grass  
567 tillers (*Festuca arundinacea* Schreb.). *Plant, Cell & Environment* **24**, 65-76.

- 568 **Mason RE, Hays DB, Mondal S, Ibrahim AM, Basnet BR.** 2013. QTL for yield, yield components  
569 and canopy temperature depression in wheat under late sown field conditions. *Euphytica* **194**,  
570 243-259.
- 571 **Mauro-Herrera M, Doust AN.** 2016. Development and Genetic Control of Plant Architecture  
572 and Biomass in the Panicoid Grass, *Setaria*. *PLoS One* **11**, e0151346.
- 573 **Mohammed U, Caine R, Atkinson J, Harrison E, Wells D, Chater C, Gray J, Swarup R, Murchie**  
574 **E.** 2019. Rice plants overexpressing *OsEPF1* show reduced stomatal density and increased root  
575 cortical aerenchyma formation. *Scientific reports* **9**, 1-13.
- 576 **Morison J, Baker N, Mullineaux P, Davies W.** 2007. Improving water use in crop production.  
577 *Philosophical Transactions of the Royal Society B: Biological Sciences* **363**, 639-658.
- 578 **Nakashima K, Takasaki H, Mizoi J, Shinozaki K, Yamaguchi-Shinozaki K.** 2012. NAC  
579 transcription factors in plant abiotic stress responses. *Biochimica et Biophysica Acta (BBA)-Gene*  
580 *Regulatory Mechanisms* **1819**, 97-103.
- 581 **Nelson DE, Repetti PP, Adams TR, Creelman RA, Wu J, Warner DC, Anstrom DC, Bensen RJ,**  
582 **Castiglioni PP, Donnarummo MG.** 2007. Plant nuclear factor Y (NF-Y) B subunits confer drought  
583 tolerance and lead to improved corn yields on water-limited acres. *Proceedings of the National*  
584 *Academy of Sciences* **104**, 16450-16455.
- 585 **Nemali KS, Bonin C, Dohleman FG, Stephens M, Reeves WR, Nelson DE, Castiglioni P, Whitsel**  
586 **JE, Sammons B, Silady RA.** 2015. Physiological responses related to increased grain yield under  
587 drought in the first biotechnology-derived drought-tolerant maize. *Plant, Cell & Environment*  
588 **38**, 1866-1880.
- 589 **Nunes TD, Zhang D, Raissig MT.** 2020. Form, development and function of grass stomata. *The*  
590 *Plant Journal* **101**, 780-799.
- 591 **Ohsumi A, Kanemura T, Homma K, Horie T, Shiraiwa T.** 2007. Genotypic variation of stomatal  
592 conductance in relation to stomatal density and length in rice (*Oryza sativa* L.). *Plant Production*  
593 *Science* **10**, 322-328.
- 594 **Prado SA, Cabrera-Bosquet L, Grau A, Coupel-Ledru A, Millet EJ, Welcker C, Tardieu F.** 2018.  
595 Phenomics allows identification of genomic regions affecting maize stomatal conductance with  
596 conditional effects of water deficit and evaporative demand. *Plant, Cell & Environment* **41**, 314-  
597 326.
- 598 **Raissig MT, Matos JL, Gil MXA, Kornfeld A, Bettadapur A, Abrash E, Allison HR, Badgley G,**  
599 **Vogel JP, Berry JA.** 2017. Mobile MUTE specifies subsidiary cells to build physiologically  
600 improved grass stomata. *Science* **355**, 1215-1218.

- 601 **Rowland-Bamford AJ, Nordenbrock C, Baker JT, Bowes G, Allen Jr LH.** 1990. Changes in  
602 stomatal density in rice grown under various CO<sub>2</sub> regimes with natural solar irradiance.  
603 *Environmental and Experimental Botany* **30**, 175-180.
- 604 **Sagan V, Maimaitijiang M, Sidike P, Eblimit K, Peterson KT, Hartling S, Esposito F, Khanal K,**  
605 **Newcomb M, Pauli D.** 2019. UAV-based high resolution thermal imaging for vegetation  
606 monitoring, and plant phenotyping using ICI 8640 P, FLIR Vue Pro R 640, and thermomap  
607 cameras. *Remote Sensing* **11**, 330.
- 608 **Schoppach R, Taylor JD, Majerus E, Claverie E, Baumann U, Suchecki R, Fleury D, Sadok W.**  
609 2016. High resolution mapping of traits related to whole-plant transpiration under increasing  
610 evaporative demand in wheat. *Journal of Experimental Botany* **67**, 2847-2860.
- 611 **Shahinnia F, Le Roy J, Laborde B, Sznajder B, Kalambettu P, Mahjourimajd S, Tilbrook J, Fleury**  
612 **D.** 2016. Genetic association of stomatal traits and yield in wheat grown in low rainfall  
613 environments. *BMC Plant Biology* **16**, 150.
- 614 **Sinclair TR, Devi J, Shekoofa A, Choudhary S, Sadok W, Vadez V, Riar M, Rufty T.** 2017.  
615 Limited-transpiration response to high vapor pressure deficit in crop species. *Plant Science* **260**,  
616 109-118.
- 617 **Stocker TF, Qin D, Plattner G-K, Tignor M, Allen SK, Boschung J, Nauels A, Xia Y, Bex V,**  
618 **Midgley PM.** 2013. *Climate change 2013: The physical science basis.* Cambridge University Press  
619 Cambridge.
- 620 **Tardieu F.** 2013. Plant response to environmental conditions: assessing potential production,  
621 water demand, and negative effects of water deficit. *Frontiers in Physiology* **4**, 17.
- 622 **Turner NC, Wright GC, Siddique K.** 2001. Adaptation of grain legumes (pulses) to water-limited  
623 environments. *Advances in Agronomy*  
624 **71**, 193-231.
- 625 **Valliyodan B, Nguyen HT.** 2006. Understanding regulatory networks and engineering for  
626 enhanced drought tolerance in plants. *Current Opinion in Plant Biology* **9**, 189-195.
- 627 **Violet-Chabrand S, Lawson T.** 2019. Dynamic leaf energy balance: deriving stomatal  
628 conductance from thermal imaging in a dynamic environment. *Journal of Experimental Botany*  
629 **70**, 2839-2855.
- 630 **Wang SG, Jia SS, Sun DZ, Hua F, Chang XP, Jing RL.** 2016. Mapping QTLs for stomatal density  
631 and size under drought stress in wheat (*Triticum aestivum* L.). *Journal of Integrative Agriculture*  
632 **15**, 1955-1967.
- 633 **Wang Z, Devos K, Liu C, Wang R, Gale M.** 1998. Construction of RFLP-based maps of foxtail  
634 millet, *Setaria italica* (L.) P. Beauv. *Theoretical and Applied Genetics* **96**, 31-36.

635 **White T, Snow V.** 2012. A modelling analysis to identify plant traits for enhanced water-use  
636 efficiency of pasture. *Crop and Pasture Science* **63**, 63-76.

637 **Xu Z, Zhou G.** 2008. Responses of leaf stomatal density to water status and its relationship with  
638 photosynthesis in a grass. *Journal of Experimental Botany* **59**, 3317-3325.

639 **Zhang JZ, Creelman RA, Zhu J-K.** 2004. From laboratory to field. Using information from  
640 *Arabidopsis* to engineer salt, cold, and drought tolerance in crops. *Plant physiology* **135**, 615-  
641 621.

642  
643  
644  
645  
646  
647  
648  
649  
650  
651  
652  
653  
654  
655  
656  
657  
658  
659  
660  
661  
662  
663  
664  
665  
666  
667  
668  
669  
670  
671  
672  
673  
674  
675  
676

677  
678  
679  
680  
681  
682  
683  
684  
685

Table 1. Regression parameters for total above-ground biomass (g per plant) in relation to canopy temperature (°C) and stomatal density (pores per mm<sup>2</sup>) of *Setaria* genotypes grown under wet and dry treatments.

---

Biomass = Intercept (b) + a(Canopy temperature)

|                    |        |     | Intercept (b) | Slope (a) | R <sup>2</sup> | p-value |
|--------------------|--------|-----|---------------|-----------|----------------|---------|
| Canopy temperature | 30 DAS | Wet | 40.00         | -1.19     | 0.13           | < 0.001 |
|                    |        | Dry | 24.02         | -0.63     | 0.09           | < 0.001 |
|                    | 32 DAS | Wet | 58.21         | -1.82     | 0.24           | < 0.001 |
|                    |        | Dry | 27.01         | -0.74     | 0.20           | < 0.001 |

Biomass = Intercept (b) + a(Stomatal density)

|                  |     |      |       |      |         |
|------------------|-----|------|-------|------|---------|
| Stomatal density | Wet | 8.94 | -0.05 | 0.05 | 0.012   |
|                  | Dry | 8.31 | -0.06 | 0.10 | < 0.001 |

---

686  
687  
688  
689  
690  
691  
692  
693  
694  
695  
696  
697  
698

699  
700  
701  
702  
703  
704  
705  
706  
707

Table 2. Putative quantitative trait loci (QTLs) for stomatal density and canopy temperature traits in the 120 F<sub>7</sub> recombinant inbred line population derived from a cross of *S.italica* and *S.viridis*, and B100 parental line.

| Trait         | Peak marker | Chr | Pos (cM) <sup>1</sup> | LOD at Peak <sup>2</sup> | Variance (%) <sup>3</sup> | Additive effect | Left CI (cM) <sup>4</sup> | Right CI (cM) |
|---------------|-------------|-----|-----------------------|--------------------------|---------------------------|-----------------|---------------------------|---------------|
| SD            | S5_42996052 | 5   | 104.8                 | 8.3                      | 20.8                      | -3.8            | 101.1                     | 106.6         |
|               | S9_10073675 | 9   | 45.6                  | 5.0                      | 11.6                      | -2.3            | 40.4                      | 52.7          |
|               | S9_50690449 | 9   | 136.5                 | 3.7                      | 8.3                       | -2.0            | 133.0                     | 146.9         |
| CT wet 30 DAS | S5_39309008 | 5   | 93.8                  | 4.4                      | 10.0                      | -0.2            | 76.2                      | 104.1         |
|               | S7_31494503 | 7   | 93.3                  | 9.2                      | 23.1                      | 0.3             | 89.3                      | 101.9         |
|               | S9_6724364  | 9   | 34.9                  | 8.8                      | 21.8                      | -0.2            | 33.9                      | 38.6          |
| CT wet 32 DAS | S7_31494503 | 7   | 93.3                  | 3.8                      | 12.0                      | 0.2             | 89.3                      | 101.9         |
|               | S9_6724364  | 9   | 34.9                  | 6.4                      | 21.0                      | -0.2            | 32.8                      | 38.6          |
| CT dry 30 DAS | S5_39309008 | 5   | 93.8                  | 5.7                      | 14.1                      | -0.2            | 92.8                      | 100.2         |
|               | S7_32133319 | 7   | 99.9                  | 8.0                      | 21.1                      | 0.4             | 92.5                      | 101.9         |
|               | S9_7218054  | 9   | 35.9                  | 6.0                      | 15.0                      | -0.2            | 32.8                      | 38.6          |

708  
709  
710  
711  
712  
713  
714  
715  
716

<sup>1</sup>Position of the peak marker in centimorgan (cM); <sup>2</sup>Logarithm of odds (LOD) of the peak marker, <sup>3</sup>Percentage of phenotypic variance explained by the QTL, <sup>4</sup>Left confidence interval of the QTL.



717 Fig. 1. Daily average values of air temperature (a) and relative humidity (b) at SoyFACE  
718 experimental field site. The horizontal dotted line indicates the mean over the entire growing  
719 season. The vertical dashed lines indicate the days after sowing the canopy temperature  
720 measurements were collected in the field.

721  
722 Fig. 2. Aerial infra-red and RGB images of *Setaria* subplots under awnings in wet and dry  
723 treatments. Infra-red image of wet awning (a) and dry awning (b). RGB image of wet awning (c)  
724 and dry awning (d). The square boxes are the measured area of each subplot canopy.

725  
726 Fig. 3. Soil volumetric water content (% vol/vol) at depths of 5 cm and 25 cm over the growing  
727 season in plots of *Setaria* supplied with either regular irrigation to maintain adequate water  
728 supply (wet treatment; light grey) or receiving no irrigation (dry treatment; dark grey). Rainfall  
729 was blocked from entering plots of both treatments using retractable rainout shelters. Data  
730 points and error bars shown the mean and standard error of three replicates per treatment.  
731 The dashed vertical lines indicate the dates when canopy temperature was measured.

732  
733 Fig. 4. Frequency distribution of stomatal density (pores mm<sup>-2</sup>) of 120 recombinant inbred lines  
734 derived from a cross of *S. italica* and *S. viridis*, and B100 parental line. Data are genotype means  
735 derived from two fields of view per leaf from each of four replicate plants. The dotted vertical  
736 lines represent the population mean value.

737  
738 Fig. 5. Stomatal density of 120 recombinant inbred lines derived from a cross of *S.italica* and  
739 *S.viridis*, and B100 parental line. Bars represent the genotype means ( $\pm$  standard error, n=4)  
740 derived from two fields of view from each of four replicate plants.

741  
742 Fig. 6. Frequency distribution of canopy temperature (°C) of 120 RILs in wet (light grey) and dry  
743 (dark grey) treatments at 30 and 32 days after sowing (DAS). Data are means derived from all  
744 pixels in the interior of three replicate plots per genotype. The dashed vertical lines represent  
745 the treatment mean value for each treatment.

746

747 Fig. 7. Scatterplot of midday canopy temperature for Setaria RILs and B100 on 30 DAS versus 32  
748 DAS under wet (●) and dry treatments (●). Lines of best fit are shown along with the Pearson's  
749 correlation coefficient (r) and associated p-value.

750

751 Fig. 8. Scatterplot of total biomass (g per plant) in relation to canopy temperature (°C) for  
752 Setaria RILs and the parent lines (A10 and B100) under wet (●) and dry conditions (●) at 30 and  
753 32 days after sowing (DAS). Data are best linear unbiased predicted (BLUP) values for each  
754 genotype. Lines of best fit are shown along with the Pearson's correlation coefficient (r) and  
755 associated p-value.

756

757 Fig. 9. Scatterplot of canopy temperature (°C) in relation to stomatal density (pores mm<sup>-2</sup>) for  
758 Setaria RILs and the parent lines (A10 and B100) under wet (●) and dry (●) conditions at 30 and  
759 32 days after sowing (DAS). Data are best linear unbiased predicted (BLUP) values for each  
760 genotype. Lines of best fit are shown along with the Pearson's correlation coefficient (r) and  
761 associated p-value.

762

763 Fig. 10. Scatterplot of total biomass (g per plant) relative to stomatal density (pores mm<sup>-2</sup>) for  
764 Setaria RILs and the parent lines (A10 and B100) under wet (●) and dry (●) conditions. Data are  
765 best linear unbiased predicted (BLUP) values for each genotype. Lines of best fit are shown  
766 along with the Pearson's correlation coefficient (r) and associated p-value.

767

768 Fig. 11. QTLs identified for stomatal density (SD) and canopy temperature (CT) under wet (grey)  
769 and dry (pink) treatments in the Setaria RIL population. Each panel corresponds to a  
770 chromosome. The arrow marks indicate the direction of the B100 allelic effect.

771

772

773 Fig. 12. QTLs on chromosomes 5, 7 and 9 identified across multiple studies of *S. italica* x *S.*  
774 *viridis* RIL population (Mauro-Herrera and Doust, 2016; Feldman et al., 2017; Banan et al., 2018;

775 Feldman et al., 2018; Ellsworth et al., 2019). The arrow marks indicate the direction of the B100  
776 allelic effect. The QTLs for stomatal density and canopy temperature identified in this study are  
777 denoted in bold and italics. BN – Branch number, CH – Culm height, CT – Canopy temperature,  
778 D13C – Delta13C, LM – Leaf mass, ML – Mesocotyl length, PAI – Plant area index, PE – Panicle  
779 emergence, PH – Plant height, PM – Panicle mass, RVR – Reproductive to vegetative mass ratio,  
780 SD – Stomatal density, STH – Secondary tiller height, VM – Vegetative mass, WUE – Water-use  
781 efficiency.

782

783

784

785

786

787

788

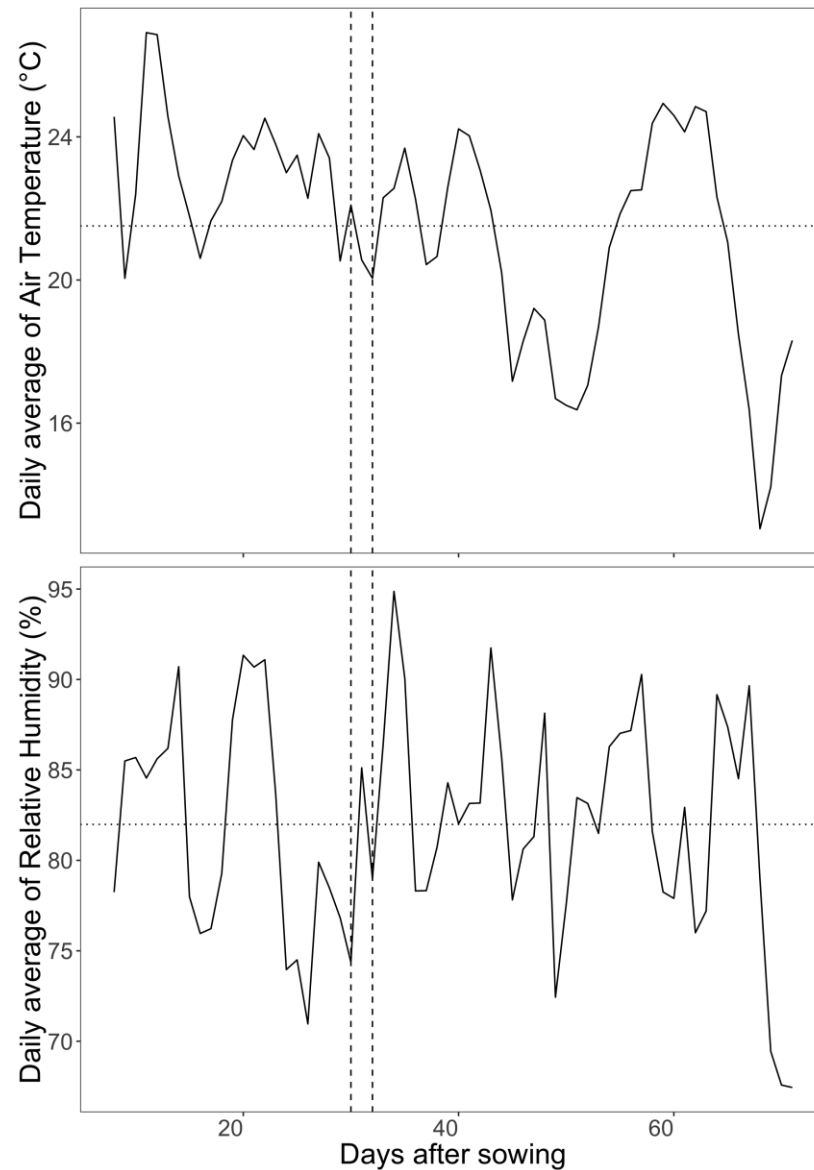

Fig. 1. Daily average values of air temperature (a) and relative humidity (b) at SoyFACE experimental field site. The horizontal dotted line indicates the mean over the entire growing season. The vertical dashed lines indicate the days after sowing the canopy temperature measurements were collected in the field.

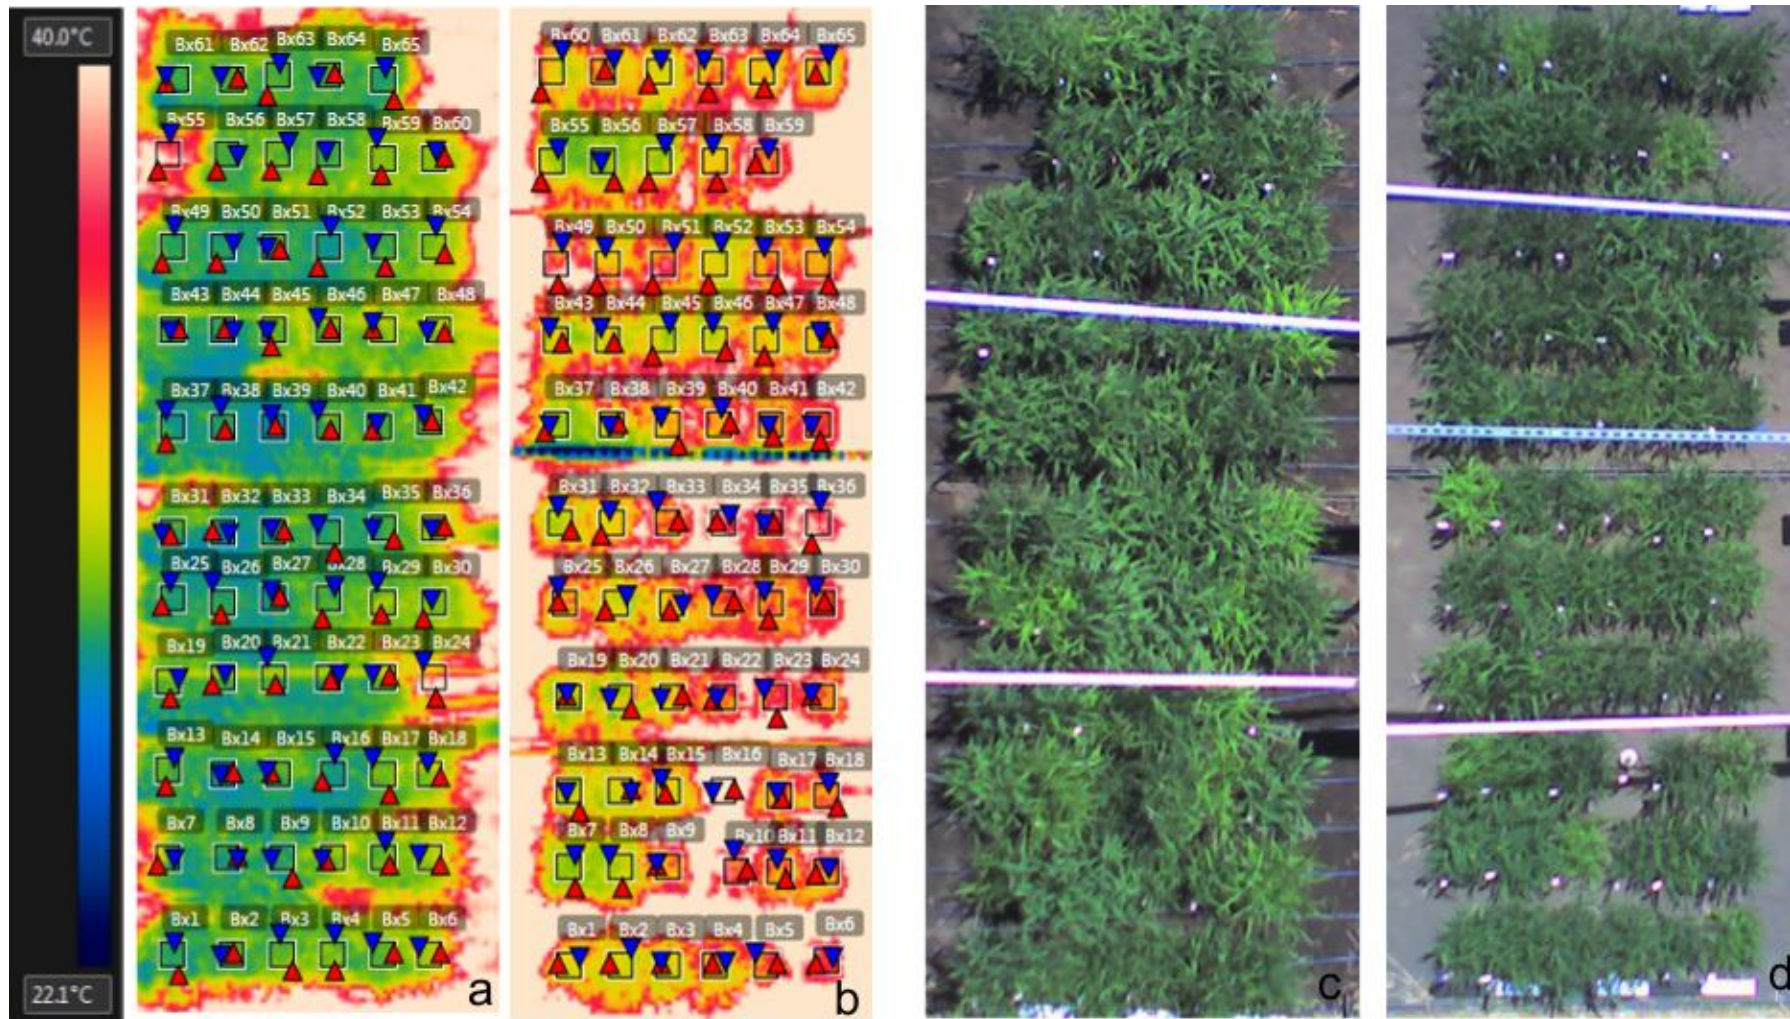

Fig. 2. Aerial infra-red and RGB images of *Setaria* subplots under awnings in wet and dry treatments. Infra-red image of wet awning (a) and dry awning (b). RGB image of wet awning (c) and dry awning (d). The square boxes are the measured area of each subplot canopy.

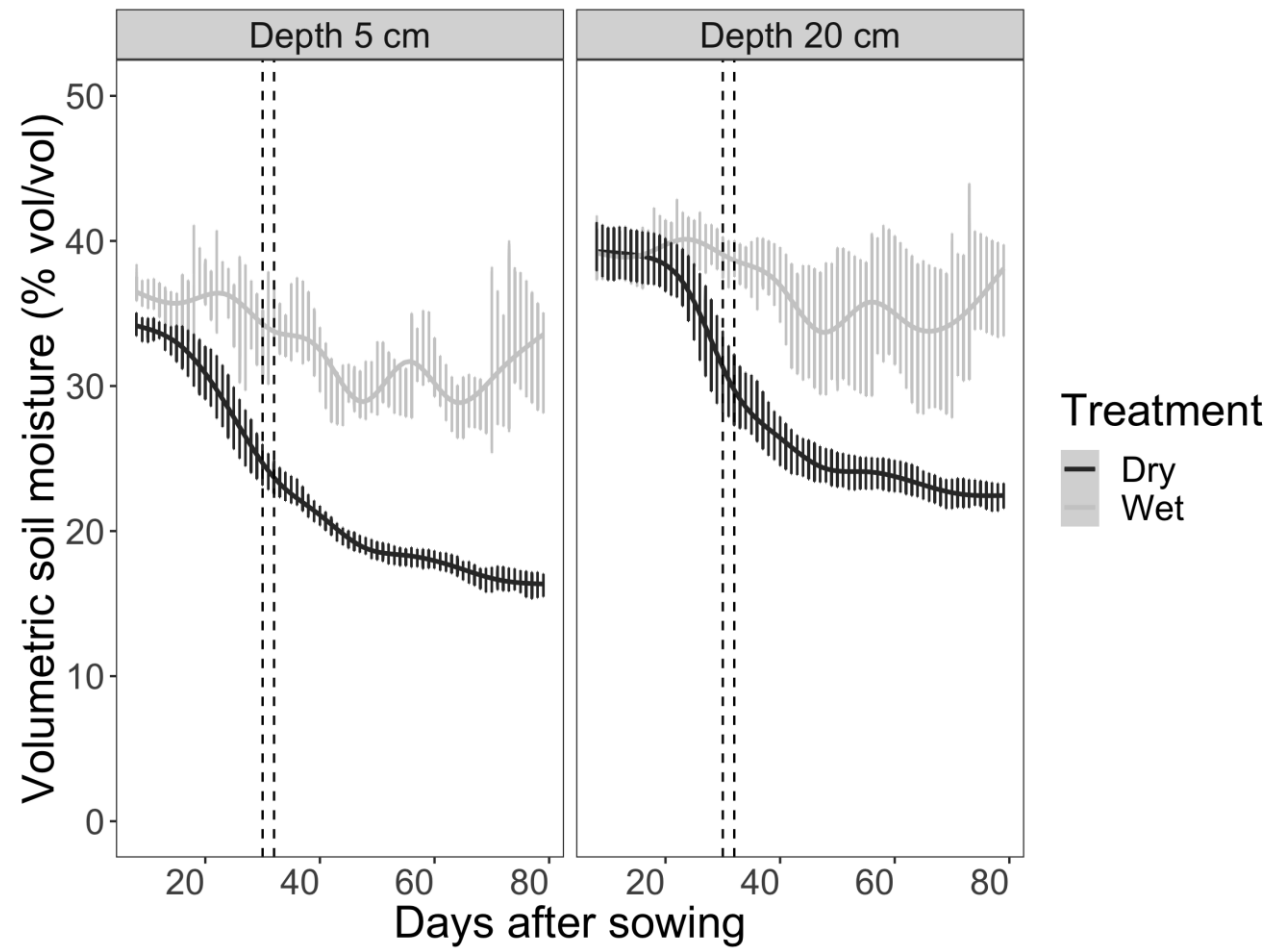

Fig. 3. Soil volumetric water content (% vol/vol) at depths of 5 cm and 25 cm over the growing season in plots of *Setaria* supplied with either regular irrigation to maintain adequate water supply (wet treatment; light grey) or receiving no irrigation (dry treatment; dark grey). Rainfall was blocked from entering plots of both treatments using retractable rainout shelters. Data points and error bars shown the mean and standard error of three replicates per treatment. The dashed vertical lines indicate the dates when canopy temperature was measured.

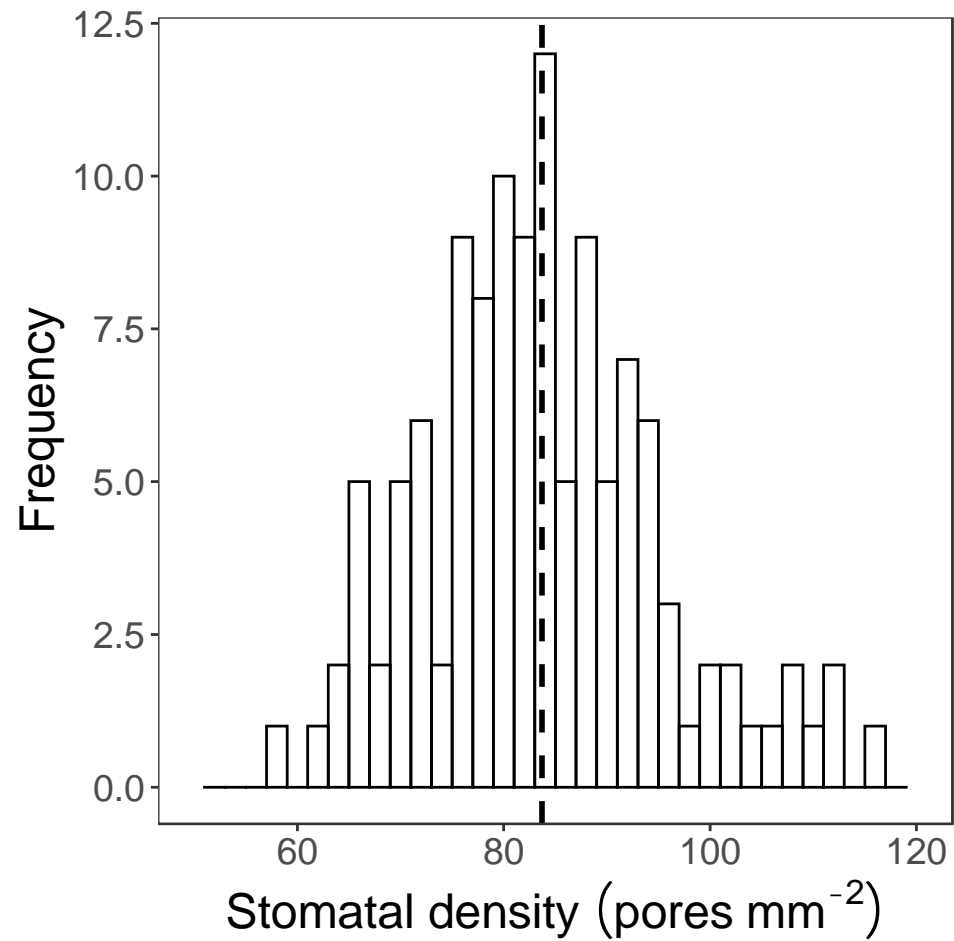

Fig. 4. Frequency distribution of stomatal density (pores mm<sup>-2</sup>) of 120 recombinant inbred lines derived from a cross of *S. italica* and *S. viridis*, and B100 parental line. Data are genotype means derived from two fields of view per leaf from each of four replicate plants. The dotted vertical lines represent the population mean value.

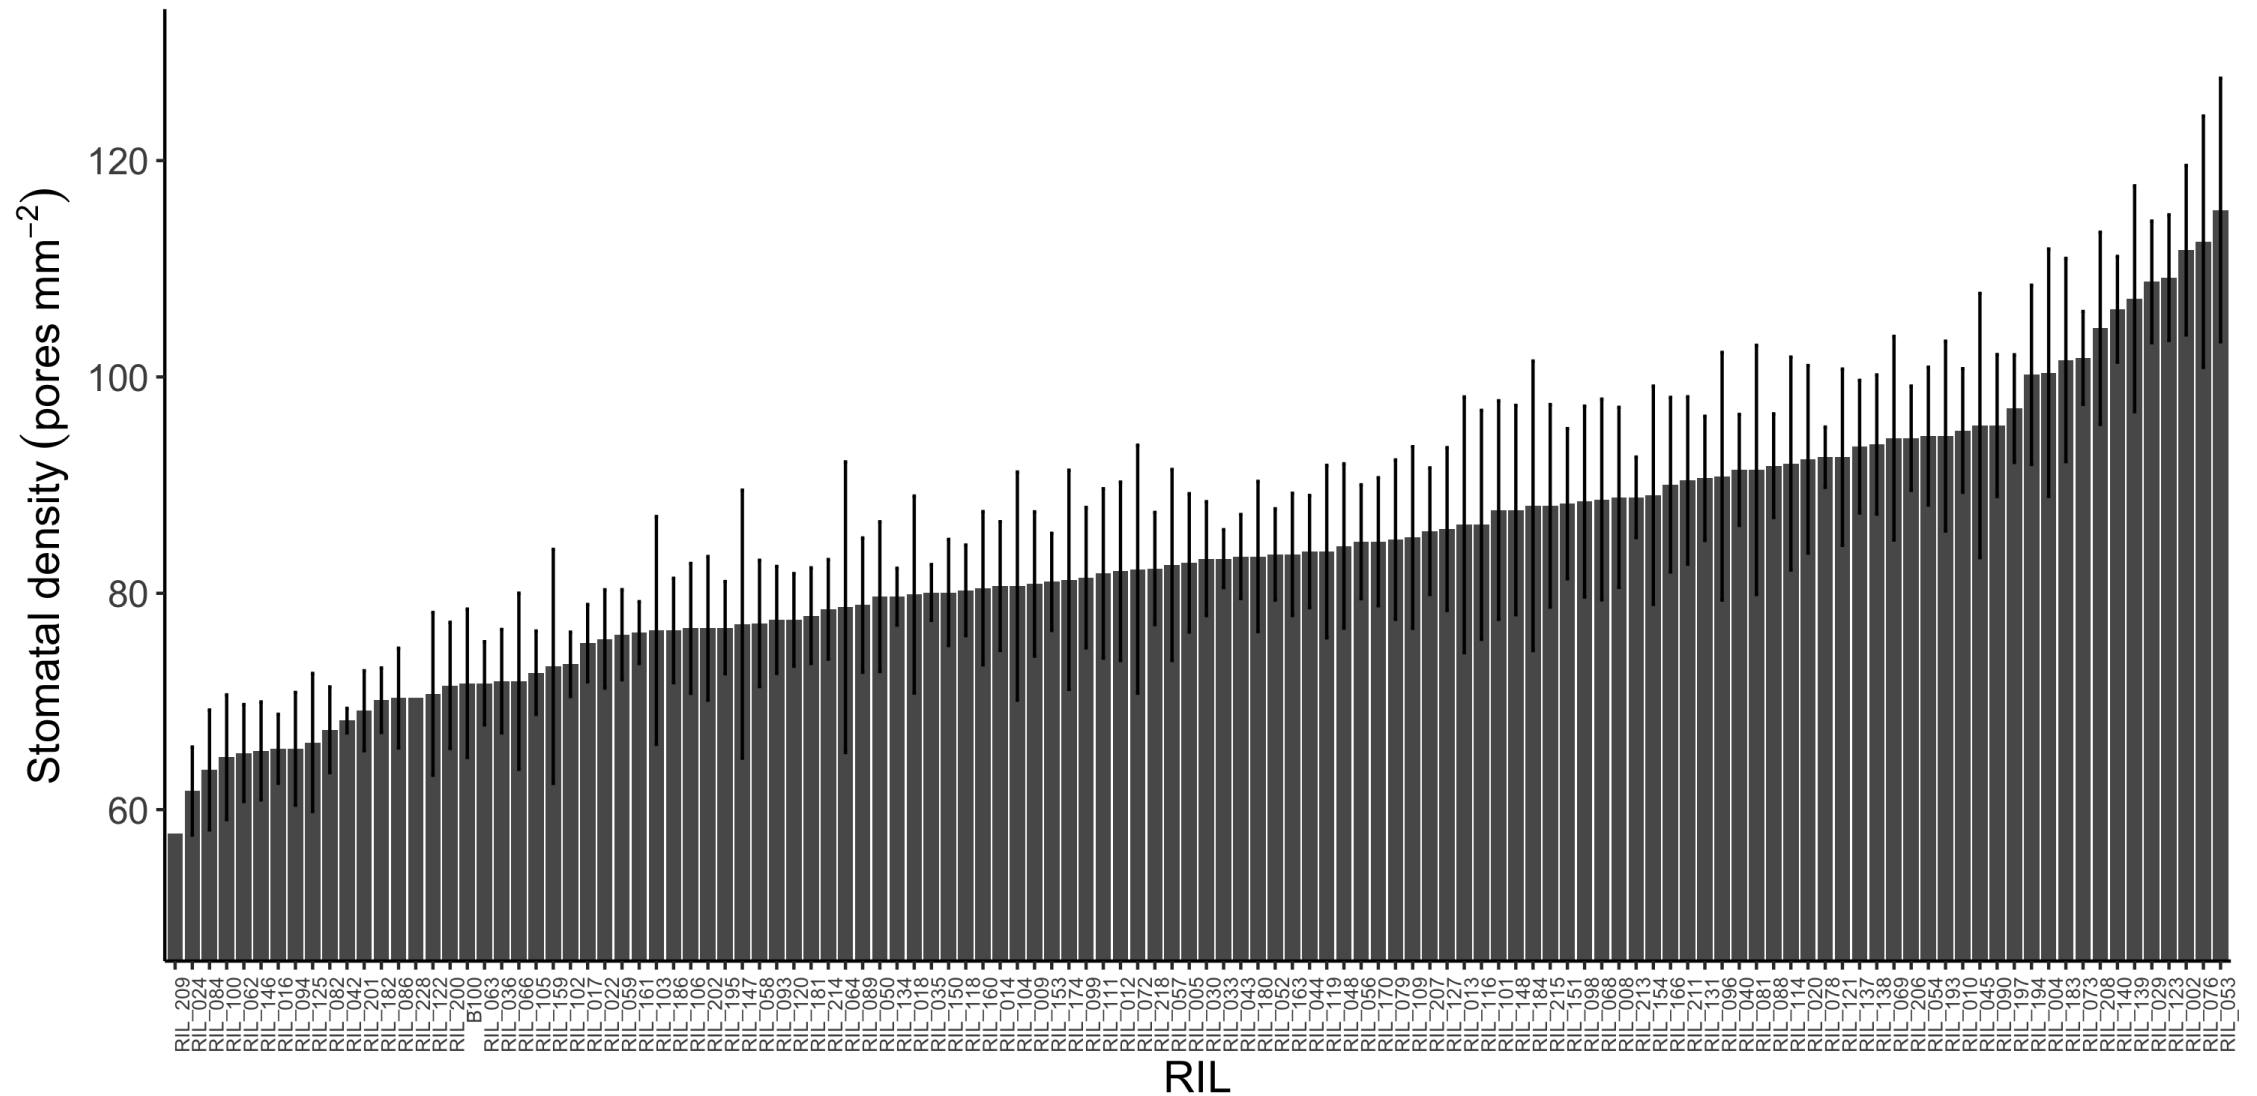

Fig. 5. Stomatal density of 120 recombinant inbred lines derived from a cross of *S.italica* and *S.viridis*, and *B100* parental line. Bars represent the genotype means ( $\pm$  standard error, n=4) derived from two fields of view from each of four replicate plants.



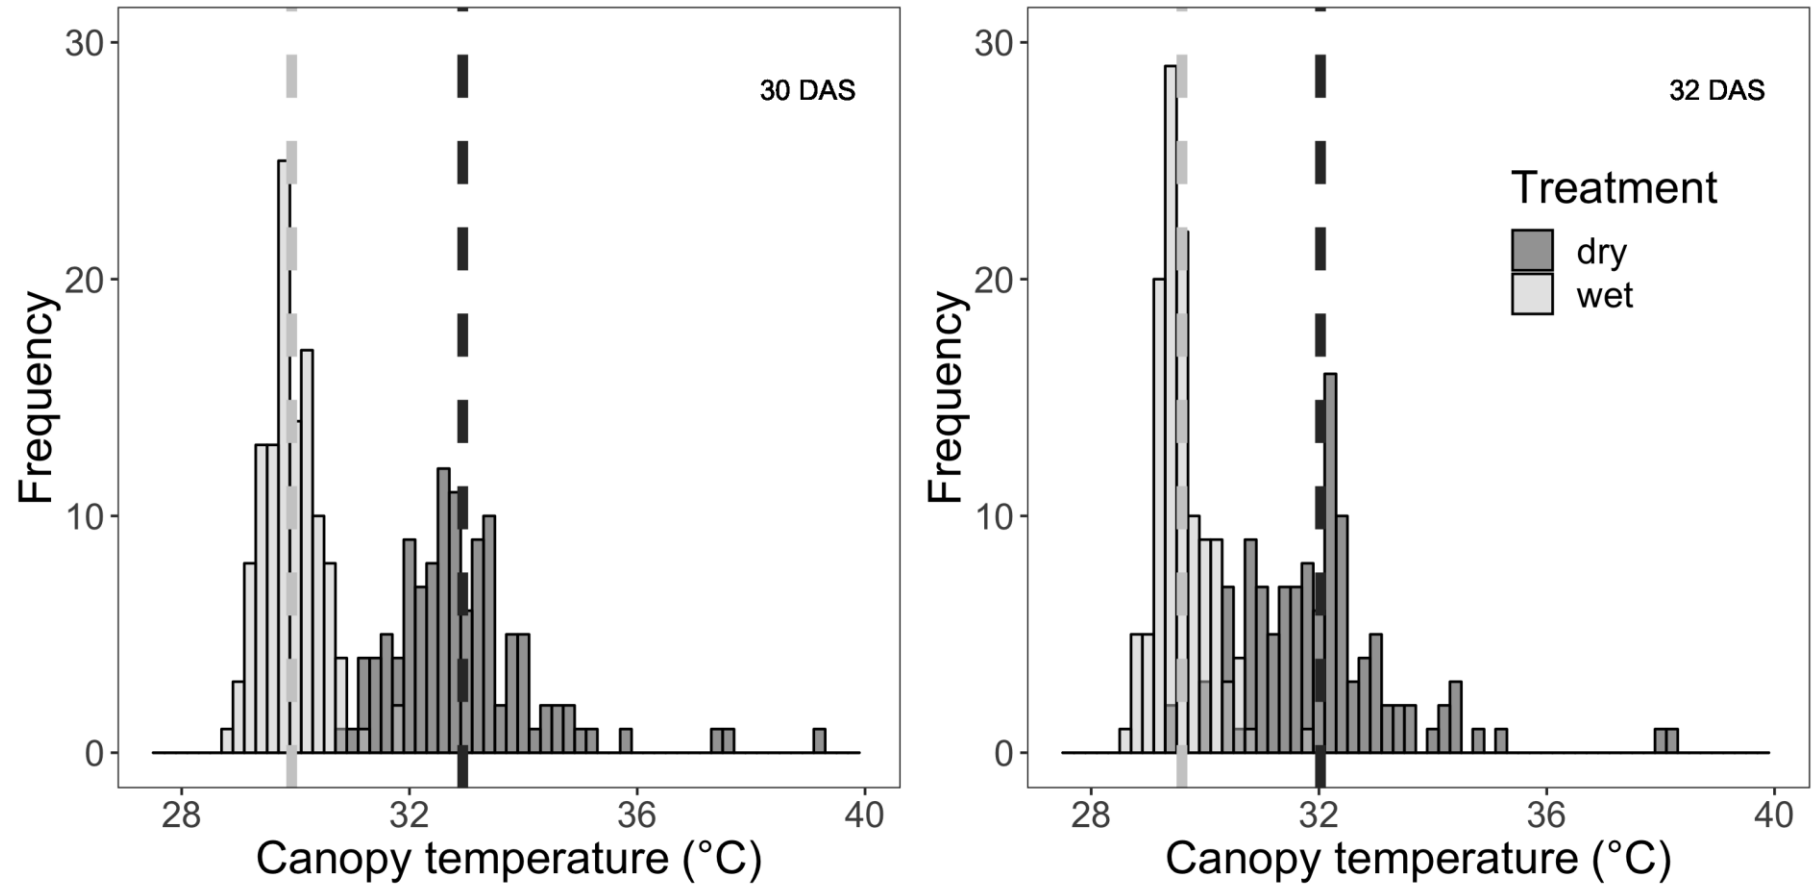

Fig. 6. Frequency distribution of canopy temperature ( $^{\circ}\text{C}$ ) of 120 RILs in wet (light grey) and dry (dark grey) treatments at 30 and 32 days after sowing (DAS). Data are means derived from all pixels in the interior of three replicate plots per genotype. The dashed vertical lines represent the treatment mean value for each treatment.

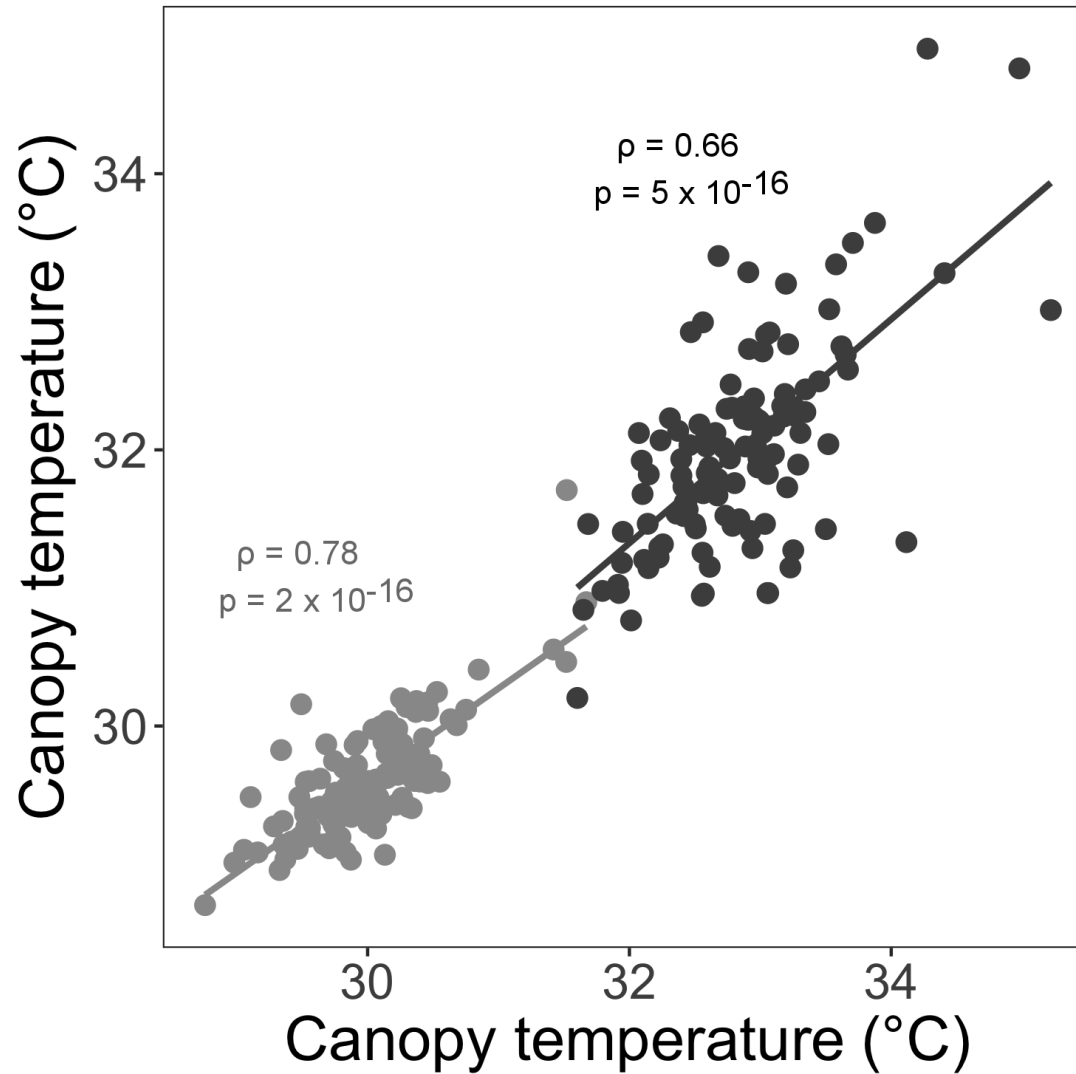

Fig. 7. Scatterplot of midday canopy temperature for Setaria RILs and B100 on 30 DAS versus 32 DAS under wet (●) and dry treatments (●). Lines of best fit are shown along with the Pearson's correlation coefficient ( $r$ ) and associated p-value.

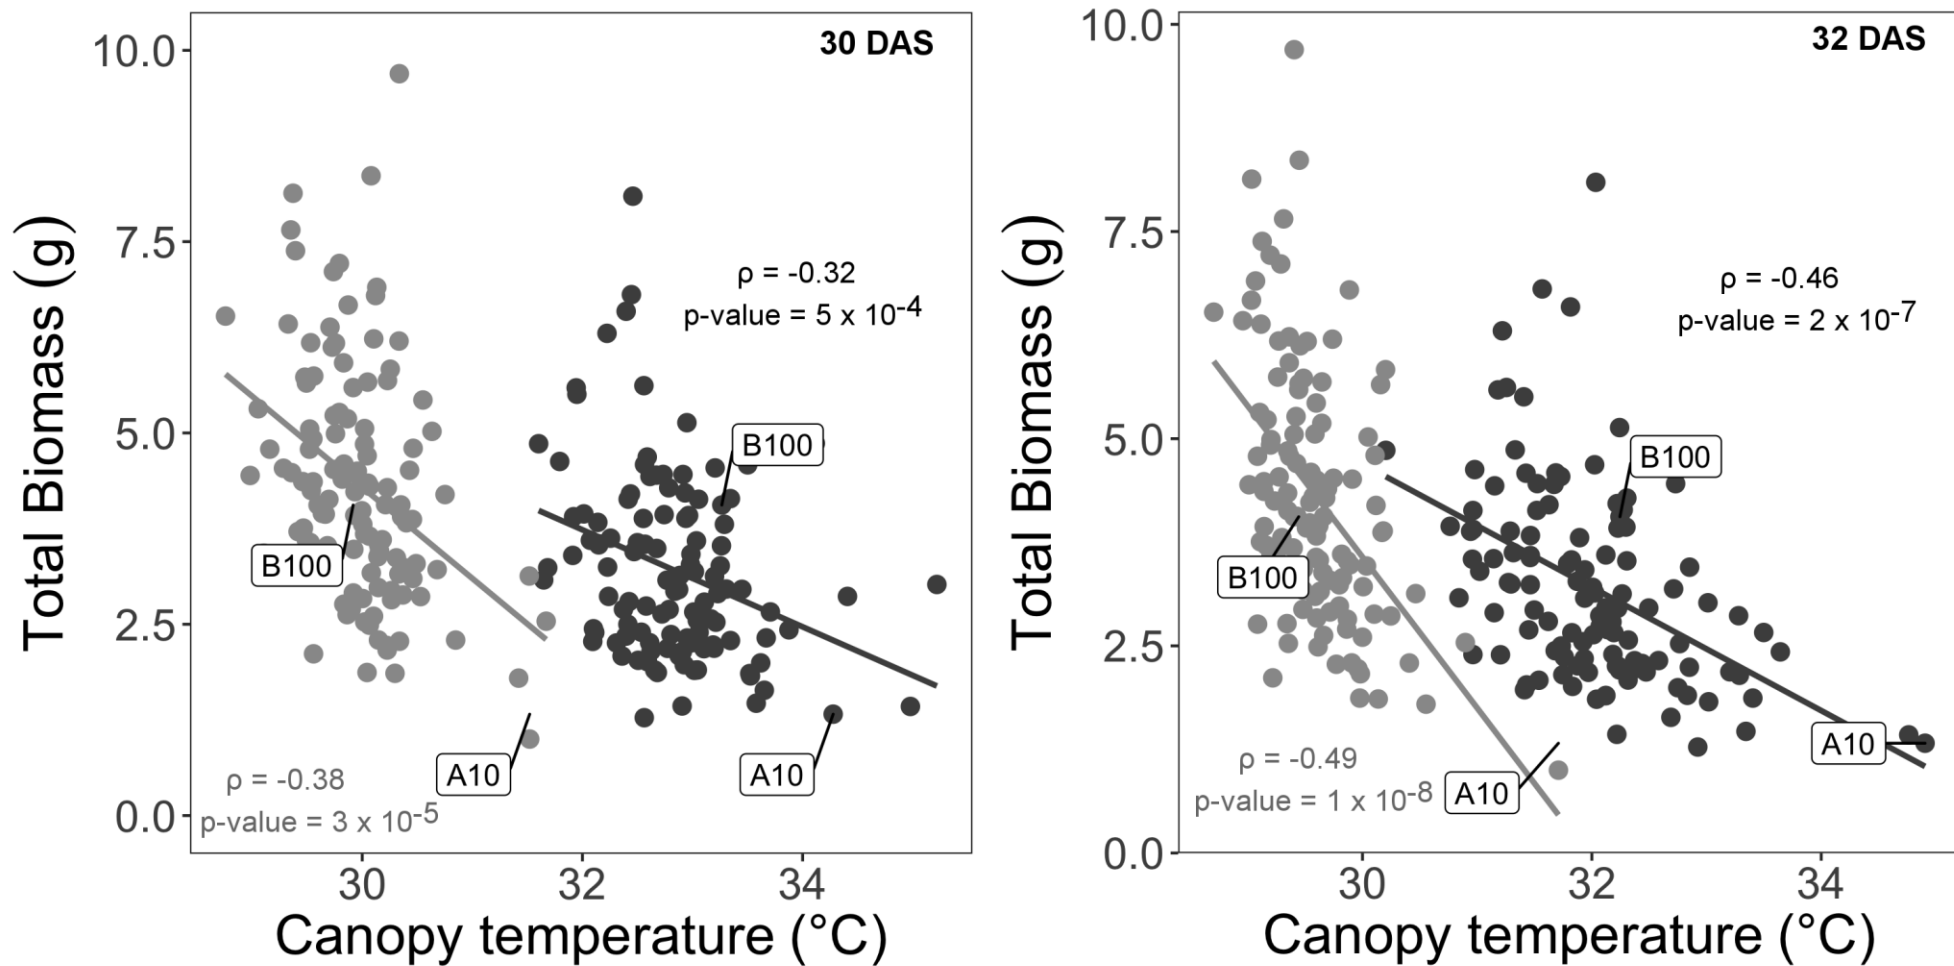

Fig. 8. Scatterplot of total biomass (g per plant) in relation to canopy temperature (°C) for Setaria RILs and the parent lines (A10 and B100) under wet (●) and dry conditions (○) at 30 and 32 days after sowing (DAS). Data are best linear unbiased predicted (BLUP) values for each genotype. Lines of best fit are shown along with the Pearson's correlation coefficient (r) and associated p-value.

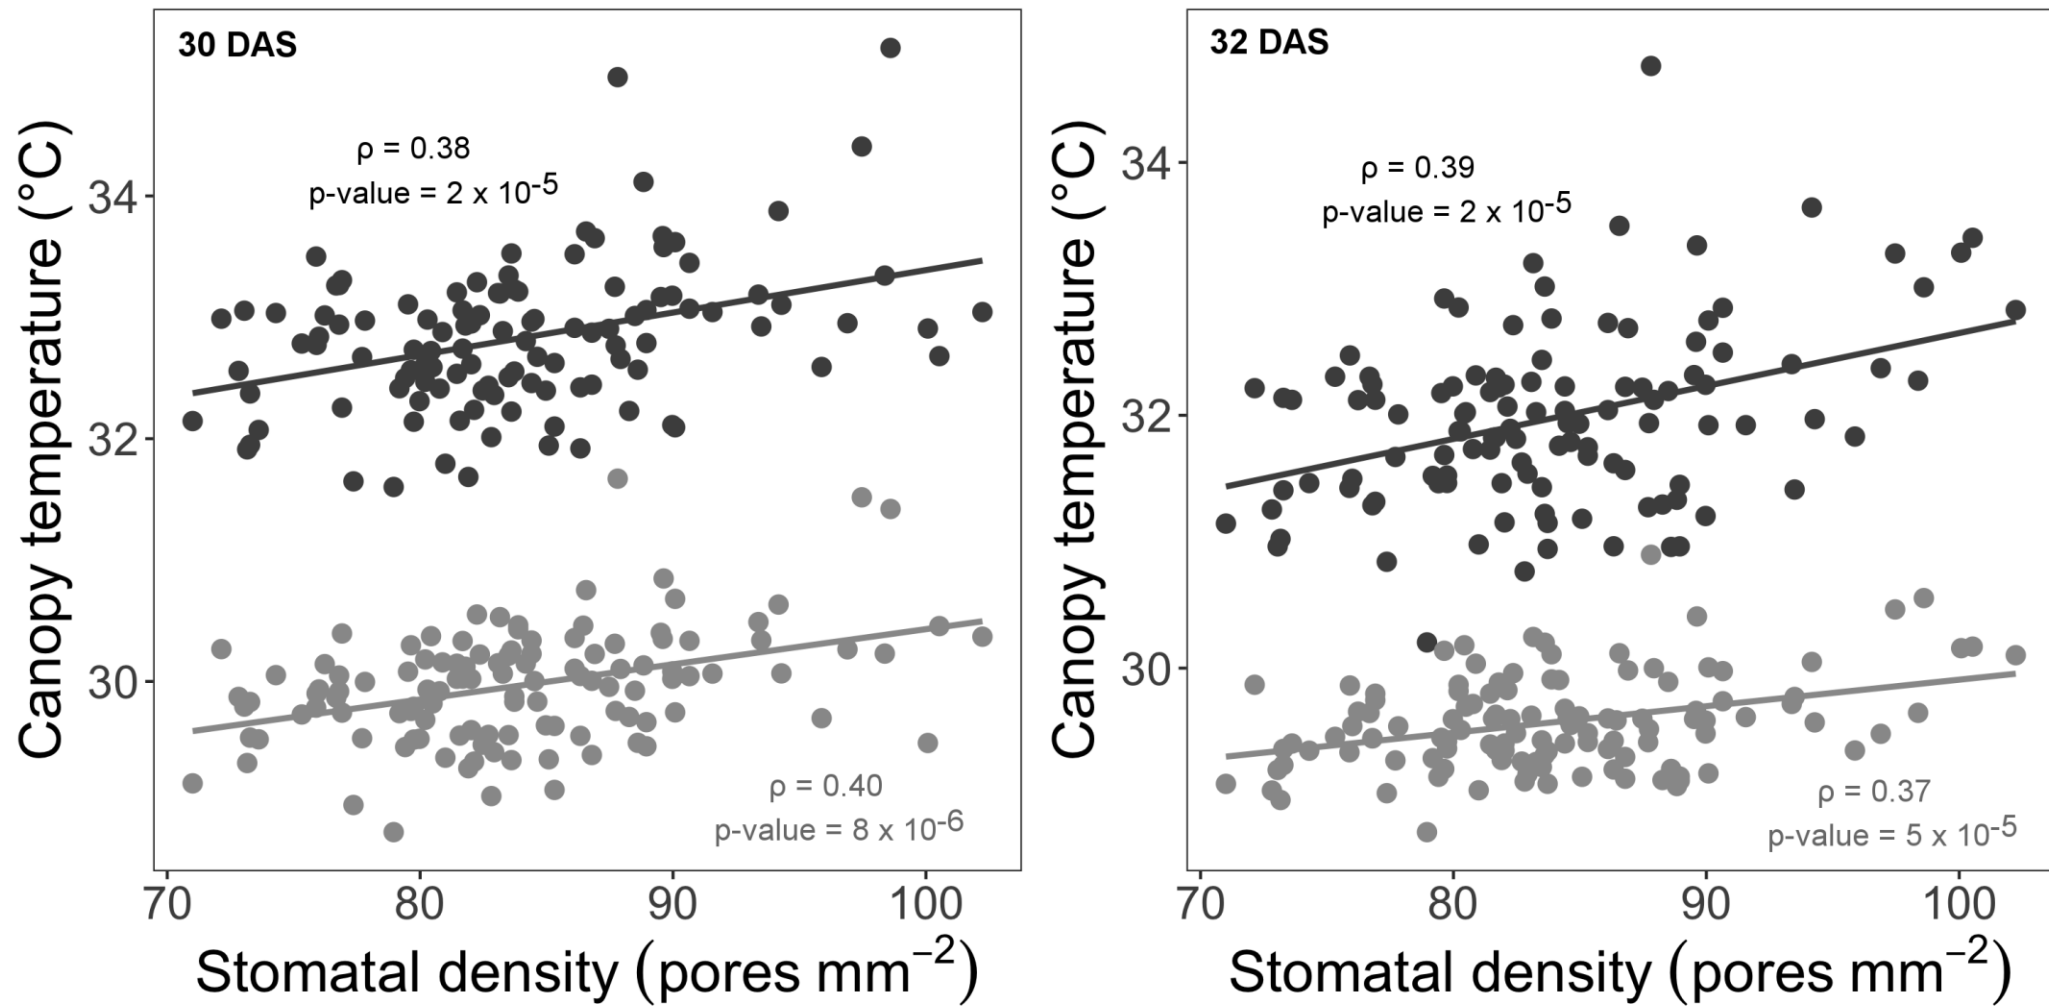

Fig. 9. Scatterplot of canopy temperature ( $^{\circ}\text{C}$ ) in relation to stomatal density (pores  $\text{mm}^{-2}$ ) for Setaria RILs and the parent lines (A10 and B100) under wet ( $\bullet$ ) and dry ( $\bullet$ ) conditions at 30 and 32 days after sowing (DAS). Data are best linear unbiased predicted (BLUP) values for each genotype. Lines of best fit are shown along with the Pearson's correlation coefficient ( $r$ ) and associated  $p$ -value.

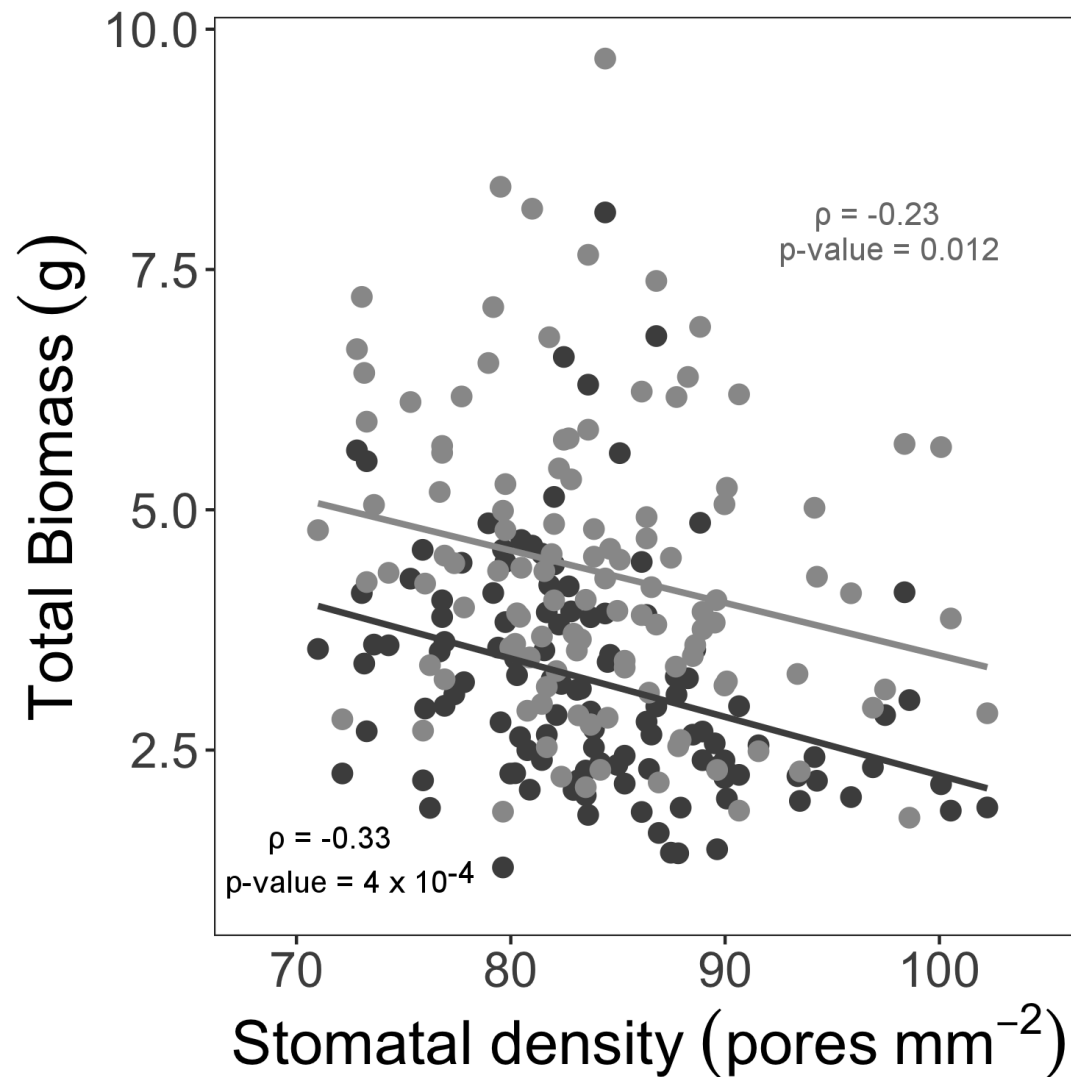

Fig. 10. Scatterplot of total biomass (g per plant) relative to stomatal density (pores mm<sup>-2</sup>) for Setaria RILs and the parent lines (A10 and B100) under wet (●) and dry (●) conditions. Data are best linear unbiased predicted (BLUP) values for each genotype. Lines of best fit are shown along with the Pearson's correlation coefficient (r) and associated p-value.

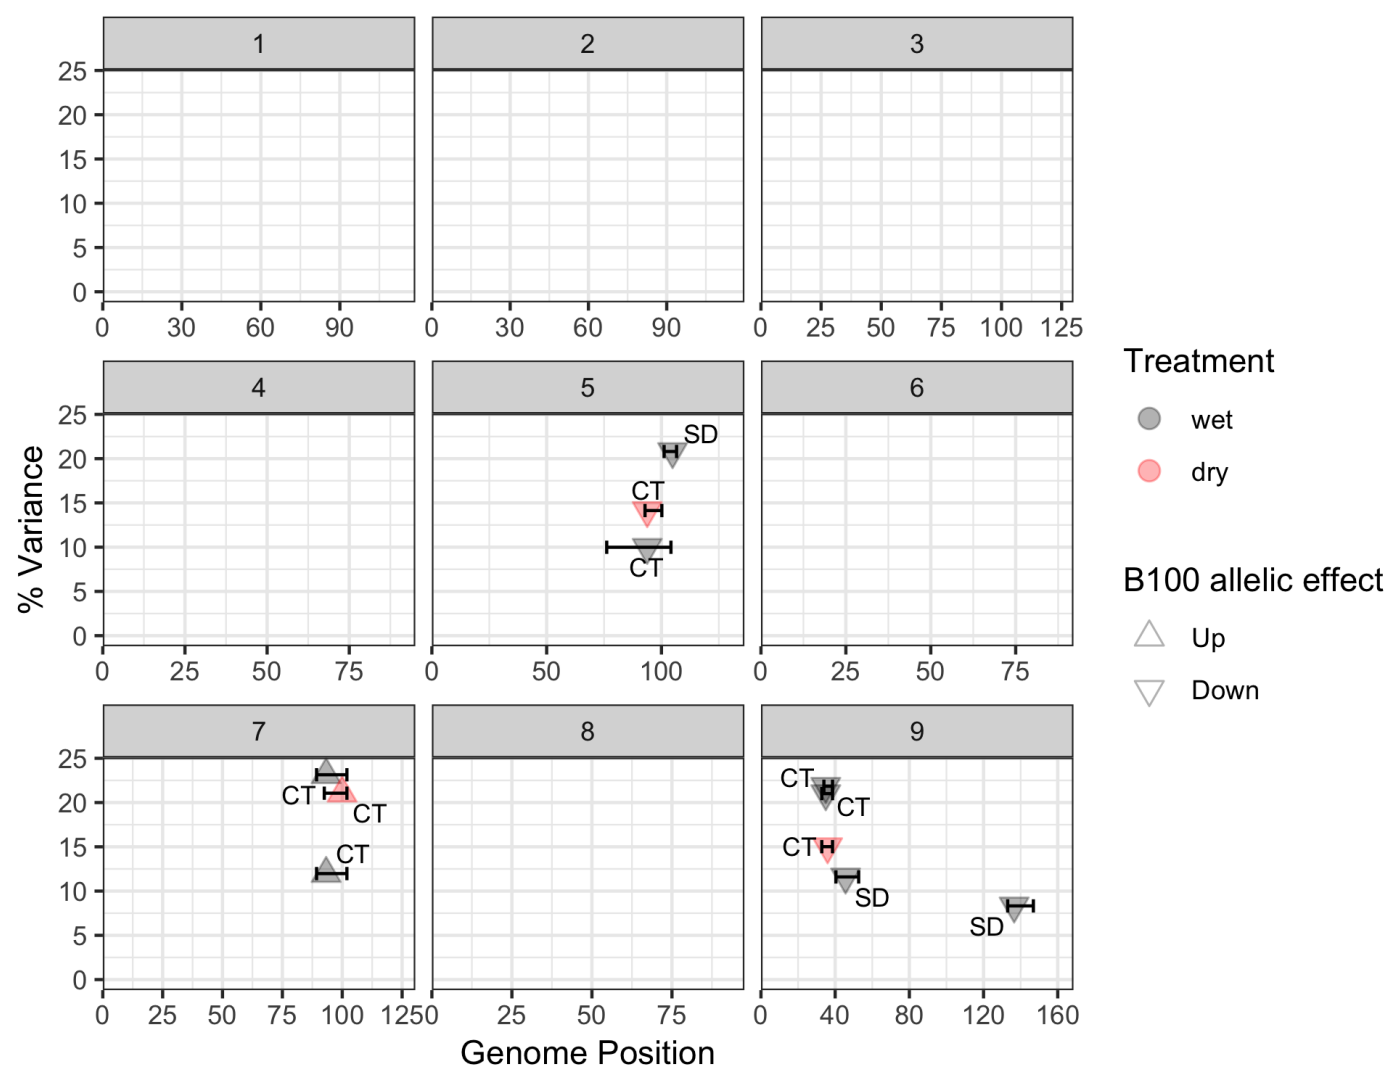

Fig. 11. QTLs identified for stomatal density (SD) and canopy temperature (CT) under wet (grey) and dry (pink) treatments in the Setaria RIL population. Each panel corresponds to a chromosome. The arrow marks indicate the direction of the B100 allelic effect.

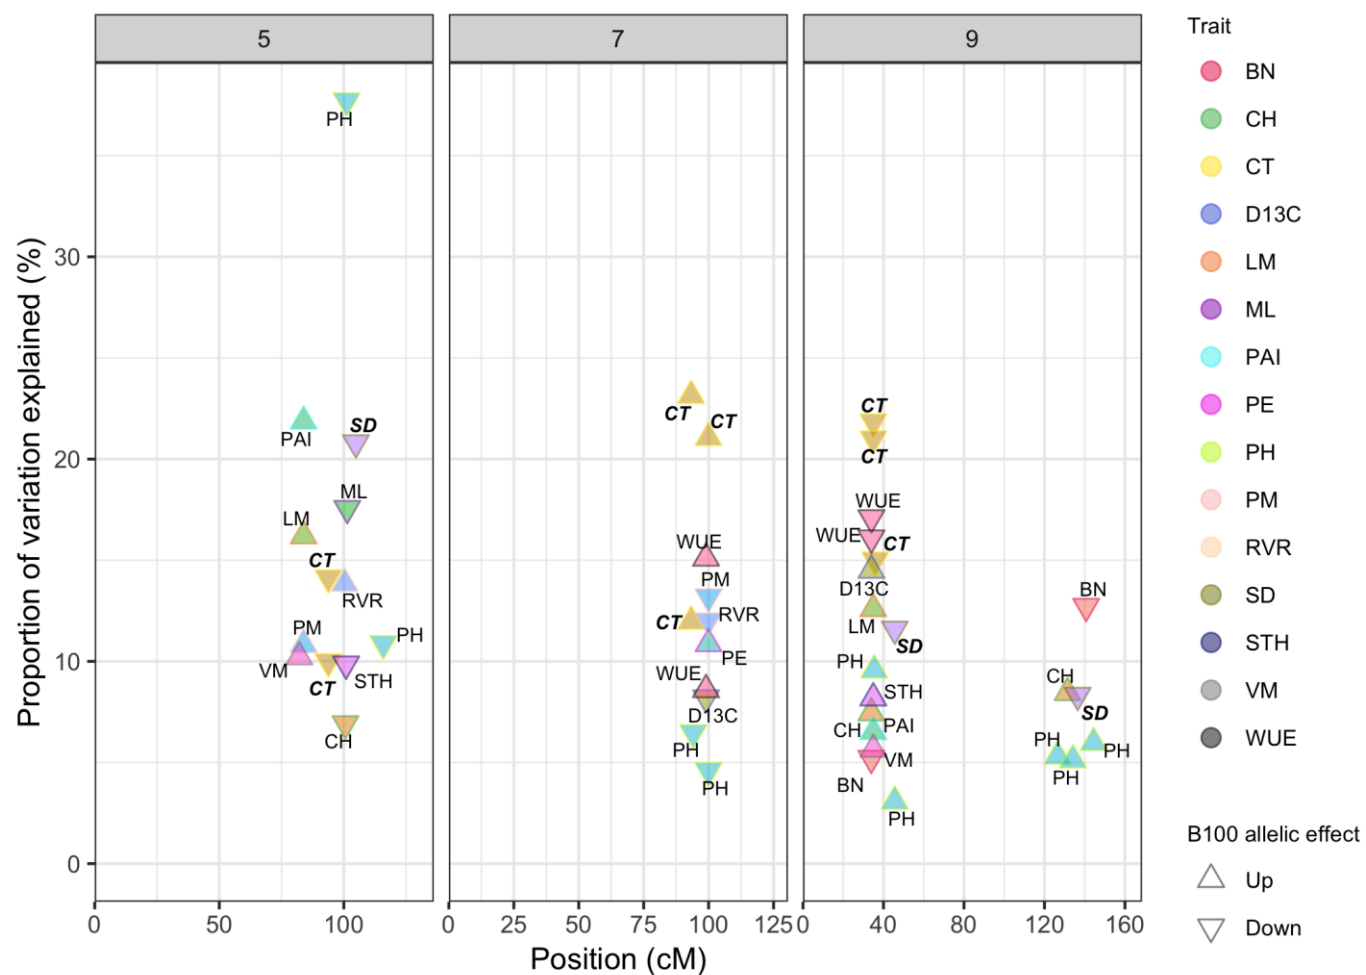

Fig. 12. QTLs on chromosomes 5, 7 and 9 identified across multiple studies of *S. italica* x *S. viridis* RIL population (Mauro-Herrera and Doust, 2016; Feldman et al., 2017; Banan et al., 2018; Feldman et al., 2018; Ellsworth et al., 2019). The arrow marks indicate the direction of the B100 allelic effect. The QTLs for stomatal density and canopy temperature identified in this study are denoted in bold and italics. BN – Branch number, CH – Culm height, CT – Canopy temperature, D13C – Delta13C, LM – Leaf mass, ML – Mesocotyl length, PAI – Plant area index, PE – Panicle emergence, PH – Plant height, PM – Panicle mass, RVR – Reproductive to vegetative mass ratio, SD – Stomatal density, STH – Secondary tiller height, VM – Vegetative mass, WUE – Water-use efficiency.
